1 **Defective influenza A virus RNA products mediate MAVS-dependent upregulation of**  
2 **human leukocyte antigen class I proteins**

3 Mir Munir A. Rahim <sup>1,\*</sup>, Brendon D. Parsons <sup>2,\*</sup>, Emma L. Price <sup>2</sup>, Patrick D. Slaine <sup>2</sup>, Becca L.  
4 Chilvers <sup>2</sup>, Gregory S. Seaton <sup>3</sup>, Andrew Wight <sup>4</sup>, Sayanti Dey <sup>2</sup>, Shannen L. Grandy <sup>2</sup>, Lauryn E.  
5 Anderson <sup>2</sup>, Natalia Zamorano Cuervo <sup>5</sup>, Nathalie Grandvaux <sup>5,6</sup>, Marta M. Gaglia <sup>7</sup>, Alyson A.  
6 Kelvin <sup>2,8</sup>, Denys A. Khapersky <sup>2,#</sup>, Craig McCormick <sup>2,#</sup>, Andrew P. Makrigiannis <sup>2,#</sup>

7  
8 <sup>1</sup>Department of Biomedical Sciences, University of Windsor, Windsor, ON, Canada N9B 3P4

9 <sup>2</sup>Department of Microbiology & Immunology, Dalhousie University, 5850 College Street,  
10 Halifax NS, Canada B3H 4R2

11 <sup>3</sup>Department of Biochemistry and Molecular Biology, Dalhousie University, 5850 College  
12 Street, Halifax NS, Canada B3H4R2

13 <sup>4</sup>Department of Cancer Immunology and AIDS, Dana Farber Cancer Institute, 450 Brookline  
14 Avenue, Boston MA, USA 02215

15 <sup>5</sup>CRCHUM-Centre Hospitalier de l'Université de Montréal, Montréal QC, Canada H2X 0A9

16 <sup>6</sup>Department of Biochemistry and Molecular Medicine, Faculty of Medicine, Université de  
17 Montréal, Montréal QC, Canada H3T 1J4

18 <sup>7</sup>Department of Molecular Biology and Microbiology, Tufts University School of Medicine, 136  
19 Harrison Avenue, Boston MA, USA 02111

20 <sup>8</sup>Department of Pediatrics, Dalhousie University, 5850 University Avenue, Halifax NS, Canada  
21 B3K 6R8

22  
23 \*Co-first authors

24 #Co-corresponding authors: D.A.K., [dkhapersky@dal.ca](mailto:dkhapersky@dal.ca), C.M., [craig.mccormick@dal.ca](mailto:craig.mccormick@dal.ca),  
25 A.M., [andrew.makrigiannis@dal.ca](mailto:andrew.makrigiannis@dal.ca)

26 Running Title: Defective influenza A virus RNAs upregulate HLA

27 Keywords: influenza A virus; NK cells; DI RNAs, mvRNAs, RIG-I, MAVS, class I MHC, HLA,  
28 KIR, interferon

29  
30 **ABSTRACT**

31           Influenza A virus (IAV) increases presentation of class I human leukocyte antigen (HLA)  
32 proteins that limit antiviral responses mediated by natural killer (NK) cells, but molecular  
33 mechanisms have not yet been fully elucidated. We observed that infection with A/Fort  
34 Monmouth/1/1947 (H1N1) IAV significantly increased presentation of HLA-B, -C and -E on  
35 lung epithelial cells. Virus entry was not sufficient to induce HLA upregulation, because UV-  
36 inactivated virus had no effect. We found that HLA upregulation was elicited by aberrant  
37 internally-deleted viral RNAs (vRNAs) known as mini viral RNAs (mvRNAs) and defective  
38 interfering RNAs (DI RNAs), which bind to retinoic acid-inducible gene-I (RIG-I) and initiate  
39 mitochondrial antiviral signaling (MAVS) protein-dependent antiviral interferon (IFN)  
40 responses. Indeed, MAVS was required for HLA upregulation in response to IAV infection or  
41 ectopic mvRNA/DI RNA expression. The effect was partially due to paracrine signalling, as we  
42 observed that IAV infection or mvRNA/DI RNA-expression stimulated production of IFN- $\beta$  and  
43 IFN- $\lambda$ 1, and conditioned media from these cells elicited a modest increase in HLA surface levels  
44 in naïve epithelial cells. HLA upregulation in response to aberrant viral RNAs could be  
45 prevented by chemical blockade of IFN receptor signal transduction. While HLA upregulation  
46 would seem to be advantageous to the virus, it is kept in check by the viral non-structural 1  
47 (NS1) protein; we determined that NS1 limits cell-intrinsic and paracrine mechanisms of HLA  
48 upregulation. Taken together, our findings indicate that aberrant IAV RNAs stimulate HLA  
49 presentation, which may aid viral evasion of innate immunity.

50

## 51 **IMPORTANCE**

52 Human leukocyte antigens (HLA) are cell surface proteins that regulate innate and adaptive  
53 immune responses to viral infection by engaging with receptors on immune cells. Many viruses  
54 have evolved ways to evade host immune responses by modulating HLA expression and/or  
55 processing. Here, we provide evidence that aberrant RNA products of influenza virus genome  
56 replication can trigger RIG-I/MAVS-dependent remodeling of the cell surface, increasing  
57 surface presentation of HLA proteins known to inhibit the activation of an immune cell known as  
58 a natural killer (NK) cell. While this HLA upregulation would seem to be advantageous to the  
59 virus, it is kept in check by the viral non-structural 1 (NS1) protein, which limits RIG-I  
60 activation and interferon production by the infected cell.

61

## 62 INTRODUCTION

63 Influenza A viruses (IAV) infect human airway epithelial cells and trigger innate host  
64 defences that limit virus replication and spread (1). Human respiratory epithelial cells are  
65 equipped with pattern recognition receptors (PRRs) including toll-like receptors (TLRs) and  
66 retinoic acid inducible gene I (RIG-I)-like receptors (RLRs) that bind viral RNA and transduce  
67 signals to initiate production of interferons (IFNs) and pro-inflammatory cytokines. In  
68 endosomes, TLR3 binds double-stranded (ds) viral RNAs (vRNAs) and initiates a signalling  
69 cascade to activate the pro-inflammatory transcription factor NF $\kappa$ B (2). However, during IAV  
70 infection of epithelial cells the bulk of viral RNA ligands for PRRs are located in the nucleus and  
71 cytoplasm; here, RIG-I serves as the chief sensor for IAV RNA species that include panhandle  
72 structures generated by complementary base-pairing of 5' and 3' ends of viral RNAs (3–8).  
73 Following vRNA binding, RIG-I associates with the mitochondrial antiviral signalling (MAVS)  
74 adaptor protein on the surface of mitochondria (9) and peroxisomes (10, 11); subsequent MAVS  
75 oligomerization causes recruitment and activation of interferon regulator factor IRF3 and IRF7  
76 and transcription of antiviral type I IFNs (IFN- $\alpha$  and IFN- $\beta$ ) and type III IFNs (IFN- $\lambda$ 1-3).

77 Both *in vitro* and *in vivo* studies have shown that during viral RNA transcription and  
78 replication, IAVs generate defective RNA products missing portions of the viral RNAs (12).  
79 These include defective interfering (DI) RNAs, which are  $\geq 178$  nt long subgenomic RNAs that  
80 can be incorporated into defective viral particles (13); mini-viral RNAs (mvRNA) that are  
81 similar in structure to DI RNAs, but are considerably shorter (~56-125 nt long) (14); and the 22-  
82 27 nt long small viral RNA (svRNA) corresponding to the 5' end of vRNA (15). Both DI RNAs  
83 and mvRNAs retain panhandle structures with closely apposed 5' and 3'-ends that are ligands for  
84 RIG-I, which initiates antiviral signal transduction. Defective viral RNAs are thought to limit  
85 productive viral replication and the pathogenic effects of infection in part by being triggers for  
86 innate immune responses. mvRNAs are potent inducers of type I IFN production, whereas  
87 svRNAs fail to trigger IFN responses (14). However, it is unknown precisely how these defective  
88 viral RNAs affect the recognition of IAV-infected cells by the immune system.

89 Among the immune effector cells recruited to the lungs within days after IAV infection  
90 are natural killer (NK) cells, which possess cytotoxic function against virus-infected cells (16,

91 17). NK cells, whose function is regulated by an array of activating and inhibitory receptors,  
92 have an important role in the control of IAV infection in mice (18, 19). The activating NKp44  
93 and NKp46, as well as co-stimulatory 2B4 and NTB-4 receptors aid in recognition and killing of  
94 IAV-infected cells by binding hemagglutinin (HA) protein on their surface (20–22). In mice,  
95 NKp46-deficiency results in increased morbidity and mortality following IAV infection,  
96 demonstrating the importance of this NK cell receptor in the control of infection (23, 24).  
97 Because binding of NKp46 to viral HA protein is dependent on sialylation of the O-glycosylated  
98 residues of NKp46, IAV can counter this recognition by cleaving the receptor sialic acids using  
99 the viral neuraminidase (NA) (25, 26). IAV can also circumvent NK cell-mediated antiviral  
100 responses by increasing the expression of inhibitory ligands, such as the class I human leukocyte  
101 antigen (HLA), also known as the human class I major histocompatibility complex (class I  
102 MHC), on the surface of infected cells. Class I HLA molecules are recognized by the human  
103 killer-cell immunoglobulin-like receptors (KIRs) on NK cells (27). Increased binding of  
104 inhibitory KIRs to class I HLA proteins on IAV-infected cells have been shown to inhibit NK  
105 cell function (28). Previously, we demonstrated that IAV infection in mice is associated with  
106 increased expression of mouse class I MHC on lung epithelial cells (29). On mouse NK cells the  
107 functional analogues of KIRs are inhibitory Ly49 receptors; we observed that disruption of  
108 inhibitory Ly49:class I MHC interactions improved survival of IAV-infected mice. Our study  
109 demonstrated that upregulation of class I MHC helps IAV evade NK cell-mediated immune  
110 responses, but the mechanism by which class I MHC is upregulated during IAV infection is not  
111 fully understood.

112 NK cell receptors bind to cognate ligands on the surface of infected cells and integrate  
113 activating and inhibitory signals that dictate the extent of NK cell activation (30). Knowing this,  
114 we initiated the current study to better understand how IAV infection affects the expression of  
115 ligands for NK cell receptors on the surface of infected epithelial cells. In-depth bioinformatic  
116 analysis of publicly available gene expression datasets revealed that IAV infection modulates the  
117 expression of a wide array of NK cell ligands, most notably, class I HLA genes that were  
118 consistently upregulated across many *in vitro* infection studies that employed different IAV  
119 strains and epithelial cell models. We complemented these findings using an A549 lung  
120 epithelial cell infection model. We observed significantly increased presentation of class I HLA  
121 and non-classical HLA-E on A/Fort Monmouth/1/1947 (H1N1) IAV-infected A549 cells. HLA

122 upregulation was dependent on post-entry steps in replication because UV-inactivated virus had  
123 no effect. Specifically, we showed that IAV mvRNAs and DI RNAs are sufficient to increase  
124 HLA expression in the absence of infection. MAVS was required for HLA upregulation in  
125 response to IAV infection or ectopic mvRNA/DI RNA expression. IAV infection or ectopic  
126 mvRNA/DI RNA-expression stimulated production of IFN- $\beta$  and IFN- $\lambda$ , and conditioned media  
127 from these cells elicited modest increases in HLA presentation from naïve epithelial cells. Using  
128 the Janus kinase inhibitor Ruxolitinib (Rux) we demonstrated that signaling downstream of IFN  
129 receptors through Jak1 plays a major role in HLA upregulation triggered by IAV replication  
130 intermediates. Finally, we determined that IAV NS1 limits cell-intrinsic and paracrine  
131 mechanisms of HLA upregulation. Our data indicates that aberrant IAV mvRNAs and DI RNAs  
132 stimulate HLA presentation, which may aid viral evasion of immune surveillance.

133

## 134 **RESULTS**

### 135 **Influenza A virus infection alters cell surface expression of ligands for NK cell receptors.**

136 NK cells control immune responses to IAV infection *in vivo* (18). NK cell receptors bind  
137 to cognate ligands on the surface of infected cells and integrate activating and inhibitory signals  
138 that dictate the extent of NK cell engagement (30). We performed an in-depth bioinformatic  
139 analysis of publicly available gene expression datasets (Table S1) to better understand how  
140 expression of known NK cell ligands is modulated by IAV infection *in vitro*. By focusing on  
141 datasets from *in vitro* IAV infections of standard epithelial cell models including primary human  
142 lung epithelial cells and alveolar adenocarcinoma A549 cells, we learned that expression of most  
143 known ligands for NK cell receptors is altered during IAV infection (Fig. 1A). In particular,  
144 there was a consistent trend of upregulation of HLA transcripts in multiple epithelial cell lines in  
145 response to infection by diverse IAV strains. These included the HLA-A, -B, -C, and -E proteins  
146 that present peptides to immune cells and bind inhibitory receptors on NK cells, as well as HLA-  
147 F, which binds to KIR receptors with context-dependent activating and inhibitory properties.

148 To confirm reports of NK cell ligand modulation, we infected A549 cells with the  
149 A/Puerto Rico/8/1934 strain (PR8) at a MOI=1 for 16 h, at which point RNA was harvested and  
150 analyzed by RT-qPCR, which revealed statistically significant increases in HLA-C and  
151 significant decreases in MICA, MICB, NECTIN3, CADM1, CDH1, CDH2 and PCNA in PR8-

152 infected A549 cells (Fig. 1B). By contrast, infection of A549 cells with the mouse-adapted  
153 A/Fort Monmouth/1/1947 (FM-MA) strain that we previously utilized to study NK cell  
154 responses to IAV infection in mice (29), caused significant increases in steady-state mRNA  
155 levels of HLA-A, -B, and -C, without causing statistically significant decreases in other NK cell  
156 ligands.

157 To determine whether changes in NK cell ligand mRNA levels led to corresponding  
158 changes in surface presentation of proteins, we infected A549 cells with PR8 or FM-MA and  
159 analyzed cell surface expression of NK cell ligands by flow cytometry (Fig. 2). We observed  
160 significant upregulation of HLA-A/B/C on the surface of PR8 and FM-MA infected cells (Fig.  
161 2A) which correlated with our RT-qPCR data (Fig. 1B). When measured individually HLA-B, -  
162 C and -E were significantly upregulated by FM-MA infection, whereas PR8 infection elicited  
163 modest increases in HLA-B only, which did not achieve statistical significance (Fig. 2A).  
164 MICA/B ligands for the activating NKG2D receptor were differentially regulated by infection;  
165 PR8 infection had no effect on cell surface levels of MICA/B, whereas FM-MA infection caused  
166 a modest downregulation that agreed with our RT-qPCR data (Fig. 2A and Fig. 1B). There was a  
167 modest but statistically significant upregulation of CD155/PVR and downregulation of  
168 CD113/NECTIN3 in FM-MA infected cells (Fig. 2B). Downregulation of CD113/NECTIN3 was  
169 consistent with our RT-qPCR data (Fig. 1B) and bioinformatics analysis (Fig. 1A). Taken  
170 together, our bioinformatic analysis of published gene expression datasets, combined with our  
171 own RT-qPCR and surface staining experiments, clearly demonstrate that IAV infection alters  
172 the expression of NK cell ligands, and that the most striking and consistent finding is increased  
173 surface presentation of class I HLA proteins, in agreement with previous studies (28, 29).

#### 174 **Defective vRNAs increase surface HLA presentation in a MAVS-dependent manner**

175 To determine whether HLA upregulation was a consequence of IAV entry or later steps  
176 in viral replication we infected A549 cells with UV-inactivated or control FM-MA virus and  
177 measured cell surface HLA levels by flow cytometry using a pan-HLA-A/B/C antibody or an  
178 HLA-B-specific antibody. UV treatment damages viral RNA and prevents transcription and  
179 replication of the viral genome (31). We observed that, unlike infectious virus that increased cell  
180 surface HLA as expected, UV-inactivated inoculum had no effect (Fig. 3A).



181           During replication the IAV RdRp frequently generates defective RNA products including  
182 DI RNAs (12) and smaller mvRNAs (14). Like intact full-length vRNAs, DI RNAs bind to the  
183 viral nucleoprotein (NP) and assemble into viral ribonucleoprotein (vRNP) structures that limit  
184 RIG-I binding (13). By contrast, mvRNAs do not bind to NP and are thought to be primary RIG-  
185 I agonists (14). One consequence of IFN signal transduction is increased cell surface HLA  
186 presentation (32). Because UV-inactivated IAV was unable to increase HLA surface  
187 presentation, we reasoned that increased HLA gene expression could be triggered by innate  
188 immune responses activated by defective RNAs produced during viral replication. To test the  
189 ability of defective RNAs to induce IFN signaling in our system, we used an IFN- $\beta$ -responsive  
190 luciferase reporter driven by an interferon-stimulated response element (ISRE) promoter  
191 element. We observed that transfection of A549 cells with constructs bearing mvRNAs, DI  
192 RNAs or full-length vRNAs substantially induced ISRE-luciferase reporter activity (Fig. 3B).  
193 Interestingly, DI RNAs from genome segment 4 strongly activated ISRE-luciferase activity,  
194 whereas full-length vRNA or mvRNAs from the same segment had a moderate effect. By  
195 contrast, all three RNA species derived from genome segment 5 activated the ISRE-luciferase  
196 reporter to a similar extent. Notably, the virus-derived RNA species all potentiated stronger  
197 ISRE-luciferase reporter activity compared to poly(I:C), a known inducer of type I IFN in  
198 transfected A549 cells. Thus, in the A549 cell line used extensively in this study, diverse viral  
199 RNA species can elicit IFN signaling.

200           Because many viruses selectively modulate HLA presentation to disrupt antiviral immune  
201 responses (33, 34) we wondered whether defective IAV vRNAs might affect HLA presentation.  
202 To test this directly, we transfected A549 cells with constructs encoding the IAV mini-replicon  
203 system bearing mvRNA, DI RNA or full-length vRNA species, and measured surface levels of  
204 HLA. Control cells transfected with poly(I:C) showed strong dose-dependent upregulation of  
205 surface HLA-A/B/C over a 48 h period (Fig. 3C). Cells expressing viral RNAs from segment 5  
206 likewise displayed strong surface HLA staining, indicating that they are sufficient to increase cell  
207 surface HLA in the absence of infection, in agreement with their ability to stimulate the ISRE-  
208 luciferase reporter (Fig. 3B).

209           RIG-I binds to IAV RNA panhandle structures and assembles with the MAVS adaptor on  
210 the surface of mitochondria and peroxisomes to drive antiviral signal transduction and IFN  
211 production (9, 10). To test whether the RIG-I/MAVS axis was involved in HLA upregulation in

212 our system, we measured surface HLA-A/B/C expression in parallel in transfected MAVS-  
213 deficient A549 cells (A549-MAVS-KO) (details of construction and validation of A549-MAVS-  
214 KO cells in Fig. S1). Class I HLA levels on the MAVS-KO cells were unaffected by transfection  
215 with mvRNA, DI RNA or full-length vRNA constructs (Fig. 3C). This indicates that HLA  
216 upregulation in IAV-infected cells results from activation of the RIG-I/MAVS pathway that  
217 recognizes viral replication intermediates.

### 218 **Class I HLA upregulation in IAV-infected cells is MAVS-dependent**

219 Having established that the RIG/MAVS axis is involved in HLA upregulation in response  
220 to ectopic expression of viral replication intermediates, we next addressed the role of RIG-  
221 I/MAVS in authentic IAV infection. A549 cells or A549-MAVS-KO cells were infected with  
222 FM-MA virus and class I HLA expression was measured by flow cytometry. At 17 hpi, class I  
223 HLA-A, -B and -C mRNA levels were significantly increased in infected WT A549 cells  
224 compared to mock-infected control cells but did not increase in MAVS-KO cells (Fig. 4A).  
225 Expression of other components of the antigen processing and presentation machinery including  
226  $\beta$ 2 microglobulin (B2M), transporter associated with antigen processing (TAP1) and proteasome  
227 subunit beta 8 (PSMB8) was significantly increased in A549 cells by 17 hpi, but not in MAVS-  
228 deficient cells (Fig. 4B). Surface class I HLA levels were largely unchanged in the early stages  
229 of infection, with moderate increases first measured at 12 hpi and increased further by 17 hpi  
230 (Figs. 4C, 4D). Cell surface levels of the non-classical HLA-E also increased on A549 cells over  
231 the infection time-course. By contrast, cell surface levels of these classical and non-classical  
232 HLA proteins remained unchanged in the A549-MAVS-KO cells throughout the time-course,  
233 despite robust accumulation of viral proteins indicative of progression of the infectious cycle  
234 (Fig. 4C, 4D). Together, these findings indicate that MAVS is required for IAV-induced HLA  
235 upregulation on the surface of infected A549 cells.

### 236 **Defective IAV RNAs elicit cell-intrinsic and paracrine upregulation of class I HLA proteins**

237 Because signaling downstream of type I IFN receptors increases class I HLA expression  
238 (32), we investigated the contribution of soluble factors to HLA expression in IAV infected cells.  
239 We infected A549 cells with FM-MA for 17 h and collected cell supernatants, which were UV-  
240 treated to inactivate virions prior to incubation with naïve A549 cells for an additional 17 h.  
241 Donor and recipient A549 cells were stained with anti-HLA-A/B/C or anti-HLA-B antiserum



242 and analyzed by flow cytometry. We observed marked increases in surface class I HLA proteins  
243 on IAV-infected A549 cells as before, compared to moderate increases on cells incubated with  
244 UV-treated conditioned medium (Figs. 5A and B). Staining cells with anti-IAV antiserum  
245 confirmed that the UV-treatment of culture supernatants inactivated virions and prevented  
246 subsequent infection of naïve A549 cells, mitigating concerns of residual infection in these  
247 experiments (Fig. 5B). Incubating naïve A549 cells with culture supernatants collected from cells  
248 expressing IAV mvRNAs yielded a similar result, with strong significant increases in class I  
249 HLA protein levels on the donor cells compared to relatively modest increases on the cells that  
250 received the conditioned medium (Fig. 5C). Together, these findings indicate that class I HLA  
251 can indeed be upregulated on epithelial cells in a paracrine manner in response to infection, but  
252 this effect is weaker than the cell-intrinsic class I HLA upregulation on the infected cell.

### 253 **HLA upregulation in response to defective IAV RNAs is dependent on IFN signaling**

254 IAV infection induces production of type I and type III IFN proteins by the infected cell  
255 that orchestrate autocrine and paracrine anti-viral responses (1, 5). Compared to uninfected A549  
256 cells, infection with FM-MA induced MAVS-dependent expression of *IFN-β* and *IFN-λ1* genes  
257 as early as 3 h post-infection, which increased to 50-fold and 150-fold, respectively, by 17 h  
258 post-infection (Fig. 6A). To confirm that type I and type III IFNs can induce HLA upregulation  
259 in our system, we treated A549 cells with IFN-β, IFN-λ1 or IFN-λ2, and compared HLA  
260 expression in IFN-treated and untreated cells. Both RT-qPCR and flow cytometry analysis  
261 showed that IFN-β was the most potent inducer of class I HLA mRNA and protein expression in  
262 A549 cells; HLA-A, HLA-B and HLA-C mRNAs accumulated in IFN-β-treated cells by 12 h  
263 post-treatment (Fig. 6B), which was reflected in increased HLA-A/B/C cell surface staining (Fig.  
264 6C). By contrast, 12 h treatment with IFN-λ1 potently increased HLA-A mRNA levels, but not  
265 HLA-B and -C mRNA levels (Fig. 6B). Overall, IFN-β was a much more potent inducer of HLA  
266 in our system compared to IFN-λ1 and IFN-λ2.

267 Autocrine and paracrine type I and III IFN signaling is mediated by IFN receptor signal  
268 transduction via downstream non-receptor tyrosine kinases, Jak1, Jak2 and Tyk2 (35–39). To  
269 directly test if IFN receptor signalling plays a role in HLA upregulation, we treated A549 cells  
270 with the Jak1 inhibitor Rux. In A549 cells transfected with mvRNA-expressing minireplicon, we  
271 observed that upregulation of HLA-A/B/C on the cell surface was inhibited by Rux treatment

272 (Fig. 6D). In control pUC19-transfected cells, Rux had no effect on HLA levels. Together, these  
273 data clearly indicate that signaling downstream of IFN receptors through Jak1 plays a major role  
274 in HLA upregulation triggered by IAV replication intermediates.

### 275 **NS1 protein limits cell-intrinsic and paracrine upregulation of class I HLA proteins**

276 In many experiments FM-MA infections elicited larger increases in class I HLA levels  
277 compared to PR8 infections. IAV genome segment 8 encodes the primary innate immune  
278 antagonist protein, non-structural protein 1 (NS1), which is highly variable between strains. The  
279 FM-MA NS1 protein lacks the carboxy-terminal 28 amino acids found in PR8 NS1 (Fig. 7A). To  
280 assess the role of NS1 in HLA upregulation, we infected A549 cells with FM-MA and PR8, as  
281 well as a panel of PR8 viruses with NS1 mutations that compromise its ability to suppress innate  
282 immune responses. These include point mutations in NS1 that disrupt its ability to suppress RIG-  
283 I activation (R38A, K41A or E96A, E97A) (40, 41) and a larger deletion that removes the  
284 effector domain and disordered carboxy-terminal tail (N80) (42). Consistent with known  
285 properties of NS1 in suppressing IFN production, all three NS1-mutant viruses caused HLA  
286 upregulation, and this upregulation was higher than the parental PR8 strain or the FM-MA strain  
287 (Fig. 7B, upper panel). Incubation of A549 cells with UV-inactivated culture supernatants from  
288 these infections revealed a key role for NS1 in limiting paracrine signalling. Conditioned media  
289 from FM-MA or PR8 infections caused moderate increases in HLA-A/B/C levels, whereas  
290 media from NS1 mutant virus infections elicited marked increases in HLA-A/B/C, and showed a  
291 trend towards increased HLA-B and HLA-E levels when measured independently (Fig. 7B,  
292 lower panel). Together, these findings clearly demonstrate that NS1 plays a lead role in  
293 suppressing the HLA presentation in IAV infected cells and bystander cells alike.

294

### 295 **DISCUSSION**

296 NK cell receptors bind to ligands on the surface of infected cells and initiate antiviral  
297 immune responses by integrating activating and inhibitory signals. Here, we show that IAV  
298 infection of cultured epithelial cells alters expression of an array of ligands for activating and  
299 inhibitory NK cell receptors. With some exceptions, we observed a general trend towards  
300 increased expression of ligands for inhibitory receptors and downregulation of ligands for  
301 activating receptors, suggesting that the net effect of viral reprogramming of epithelial cells

302 could be suppression of NK cell responses. Class I HLA proteins are recognized by KIR proteins  
303 on NK cells, and increased binding of KIR by HLA on IAV-infected cells *in vitro* has been  
304 shown to inhibit NK cell activity (28). However, the mechanisms that control HLA upregulation  
305 on IAV-infected cells are not fully understood. Here we report that class I HLA upregulation  
306 depends on post-entry steps in replication because UV-inactivated virus had no effect on HLA  
307 gene expression or accumulation of HLA proteins on the surface of A549 epithelial cells. We  
308 observed that defective viral RNAs produced during IAV replication were sufficient to induce  
309 expression and cell surface presentation of class I HLA on infected cells. Knowing that the RIG-  
310 I/MAVS signaling axis is the primary mechanism of detection of IAV replication intermediates  
311 in infected cells that drives antiviral responses, we tested HLA upregulation in MAVS deficient  
312 cells. We observed that genetic deletion of MAVS prevented class I HLA upregulation in  
313 response to IAV infection or ectopic expression of mvRNAs or DI RNAs, suggesting that  
314 aberrant viral RNAs generated during infection are bound by RIG-I and transduce signals that  
315 increase HLA gene expression.

316 Our work shows that IAV infection causes MAVS-dependent increases in expression of  
317 the antigen processing and presentation machinery including class I HLA-A, -B and -C and  
318 associated B2M, TAP1 and PSMB8 proteins, as well as the non-classical HLA-E protein. These  
319 comprise an antiviral gene expression program that responds to detection of defective viral  
320 RNAs by RIG-I. Cytotoxic T cells (CTL) and NK cells rely on HLA proteins for target cell  
321 recognition (43–45). Specifically, CTL activation and lysis of target cells requires binding to  
322 class I HLA proteins loaded with viral peptide antigens or HLA-E proteins loaded with  
323 noncanonical peptides from viruses and stress-related proteins (44, 46). By contrast, NK cell  
324 activation is inhibited by increased HLA protein levels on the surface of virus-infected cells by  
325 engaging inhibitory KIR proteins, as a main function of NK cells is to destroy host cells that  
326 have no surface expression of class I HLA proteins (28, 33, 34). Our observations are consistent  
327 with numerous reports of viruses that induce class I HLA expression or encode structurally  
328 similar immunoevasins that engage inhibitory receptors on NK cells and undermine their activity  
329 (29, 33, 34, 47–50). Thus, MAVS-dependent increases in cell surface class I HLA proteins have  
330 the potential to skew antiviral immune responses to thwart NK cells at the expense of potential  
331 CTL activation, which suggests that NK cells represent an existential threat for many viruses.

332 In the course of these studies we discovered that IFN can amplify responses to aberrant  
333 viral RNA products to increase HLA presentation. Specifically, we found that IAV infection of  
334 A549 cells stimulated production of IFN- $\beta$  and IFN- $\lambda$ 1 in a MAVS-dependent manner, which  
335 dramatically increased at later times post-infection. Conditioned medium collected from these  
336 infected cells elicited modest, but significant, increases in HLA presentation on naïve epithelial  
337 cells that paled in comparison to the magnitude of increase on the donor infected cells.  
338 Conditioned medium collected from cells expressing IAV mRNAs and DI RNAs similarly  
339 induced modest increases in surface class I HLA proteins when incubated with naïve A549 cells.  
340 We have not yet taken steps to fully characterize the composition of these culture supernatants,  
341 but the available evidence points to a role for type I IFNs, and, to a lesser extent, type III IFNs.  
342 However, it remains formally possible that additional factors secreted by infected cells could  
343 contribute to HLA gene expression.

344 HLA is upregulated in response to infection by a wide array of viruses, but underlying  
345 mechanisms differ. Hepatitis C virus (HCV) infection indirectly increases cell surface class I  
346 HLA levels by increasing expression of TAP1 and aiding transport of processed peptides to the  
347 endoplasmic reticulum where they can be loaded onto HLA and transported to the cell surface  
348 (34). Similarly, West Nile virus (WNV) infection increases TAP1 activity, resulting in increased  
349 transport of processed peptide antigens into the ER and higher levels of HLA:peptide complexes  
350 on the surface of infected cells (51). By contrast, Zika virus infection stimulates the RIG-  
351 I/MAVS/IRF3 pathway and downstream IFN- $\beta$  expression, which increases HLA expression in  
352 infected cells (33). This mechanism is quite similar to the one we describe herein for IAV, except  
353 that in Zika virus infected cells RIG-I binds to the 5'-triphosphate end of the intact (+)-sense  
354 ssRNA virus genome (52) rather than defective RNA products of the IAV polymerase.

355 In this study we identified a viral protein, NS1, which normally prevents RIG-I-mediated  
356 detection of defective viral RNAs and downstream IFN signal transduction, that restrained class I  
357 HLA presentation. Indeed, NS1 not only suppressed HLA presentation on infected cells, but it  
358 also had a dramatic impact on HLA expression in bystander cells; treatment of naïve A549 cells  
359 with UV-inactivated culture supernatants collected from NS1 mutant virus infections elicited  
360 strong class I HLA upregulation compared to controls. However, NS1 has also been shown to  
361 increase transcription of the endoplasmic reticulum aminopeptidase 1 (*ERAP1*), which encodes a

362 component of the antigen presentation machinery (53). Thus, the effect of NS1 on class I HLA-  
363 mediated antigen presentation is not limited to the effects mediated by IFN inhibition. More  
364 detailed studies of this hypervariable virulence factor will be required to fully understand the  
365 impact of NS1 on innate immune responses involving NK cells.

366 The existence of aberrant IAV RNA species has been well documented, but it has been  
367 less clear whether these products can benefit the virus. There is substantial evidence that  
368 defective RNA products of the viral polymerase limit productive viral replication by inducing  
369 IFN responses and promoting the generation of defective viral particles when incorporated into  
370 viral progeny. Our work demonstrates that aberrant IAV mRNAs and DI RNAs stimulate class  
371 I HLA expression, which may aid viral evasion of NK cell-mediated immune responses.

372

## 373 **MATERIALS AND METHODS**

### 374 **Cell lines**

375 A549 cells and derivatives were cultured in complete Dulbecco's modified Eagle's  
376 medium (DMEM) supplemented with 10% fetal bovine serum (Thermo Fisher Scientific) at  
377 37°C and 5% CO<sub>2</sub>. To generate A549-MAVS-KO cells, A549 cells were seeded at 1.65 x 10<sup>5</sup>  
378 cells per well in a 12-well cluster dish to obtain a confluency of 80% the next day. One hour  
379 before transfection, medium was changed to F12 medium supplemented with 1% L-glutamine  
380 and 10% Fetalclone III serum (FCI-III) (Thermo Fisher Scientific). A total of 1.6 µg of Cas9  
381 Nuclease Expression Plasmid (Dharmacon, #U-005200-120), 50 nM tracrRNA (Dharmacon) and  
382 50 nM crRNA (crRNA non-targeting control 1 #U-007501-05 or crRNA human MAVS (Gene  
383 ID:57506) ex2, #GRANB-000259) were transfected with 40 µg/mL Dharmafect DUO  
384 transfection reagent (Dharmacon). 48 hours later, 2 µg/mL puromycin (Sigma Aldrich) was  
385 added to select for cells that have integrated the Cas9 expression plasmid. Cells were cultured for  
386 7 days. Monoclonal populations were obtained by seeding cells at 40 cells/mL and isolation of  
387 clones using cloning rings. Gene editing was confirmed by Sanger sequencing at the Génome  
388 Québec Innovation Centre (McGill University, Montréal, QC). CRISP-ID web application tool  
389 (54) was used to locate the targeted region and monitor the insertions/deletions within the gene.  
390 crRNA non-targeting control sequence: GATACGTCGGTACCGGACCG. crRNA human  
391 MAVS (Gene ID: 57506) ex2 sequence: GGATTGGTGAGCGCATTAGA.

## 392 **Viruses and infections**

393 Wild-type (WT) influenza A/Puerto Rico/8/1934 H1N1 (PR8) virus was generated using  
394 the 8-plasmid reverse genetic system (55) as previously described (40, 42). Viral stocks were  
395 produced in Vero cells and titers were determined by plaque assays in Vero cells. NS1 mutations  
396 were verified by Sanger sequencing of virus stocks. Mouse-adapted influenza A/Fort  
397 Monmouth/1/1947 (FM-MA) virus was a generous gift from Dr. Earl G. Brown (University of  
398 Ottawa). Viral stocks were produced in MDCK cells and infectious titers determined by plaque  
399 assays in MDCK cells. All plaque assays were performed using 1.2% Avicel overlays as  
400 described in Matrosovich *et al.* (56). Plaque assays and virus production in MDCK cells were  
401 performed in the presence of 1 µg/ml tosyl phenylalanyl chloromethyl ketone (TPCK)-treated  
402 trypsin (Sigma Aldrich), whereas similar procedures in Vero cells employed 2.5 µg/ml TPCK-  
403 treated trypsin. A549 cell monolayers were mock-infected or infected with the WT or mutant  
404 viruses at MOI=1 for 1 h at 37°C. Monolayers were washed with PBS and overlaid with fresh  
405 infection media (0.5% BSA in DMEM supplemented with 20 µM L-glutamine) and incubated at  
406 37°C in 5% CO<sub>2</sub> atmosphere.

## 407 **Plasmids, transfections and luciferase assays**

408 Full-length, DI and mvRNA minireplicon plasmids were a generous gift from Dr. Aartjan  
409 te Velthuis (Cambridge University, Cambridge, UK). A549 cells were co-transfected using  
410 Lipofectamine 2000 (Thermo Fisher Scientific) with plasmids encoding the three polymerase  
411 subunits (PB1, PB2 and PA) and NP from A/Udorn/307/1972 (H3N2) IAV, a generous gift from  
412 Dr. Yoshihiro Kawaoka (University of Wisconsin-Madison), and luciferase reporter plasmids  
413 under the control of the interferon-stimulated response element (ISRE) promoter (firefly) and the  
414 CMV promoter (Renilla). At 24 h post-transfection, cells were washed with PBS and lysed in 1x  
415 Reporter Lysis Buffer (Promega). The dual luciferase assay was performed 24 h post-  
416 transfection using the Dual-Glo Luciferase Assay System (Promega).

## 417 **RNA purification, cDNA preparation and qPCR**

418 RNA was extracted from cells and purified using the Quick-RNA miniprep kit (Zymo  
419 Research), following manufacturer's protocol. In all cases, the RNA was treated with Turbo  
420 DNase (Life Technologies), then reverse transcribed using Verso cDNA synthesis kit (Thermo  
421 Fisher Scientific) according to the manufacturer's protocol. qPCR was performed using iTaq



422 Universal SYBR Green supermix (Bio-Rad) on a Bio-Rad CFX Connect instrument and  
423 analyzed using the Bio-Rad CFX Manager 3.1 program. Primers used are listed in Table 1.

#### 424 **Flow cytometry**

425 IAV-infected, mock-infected, or transfected A549 cells or A549-MAVS-KO cells were  
426 resuspended using Versene solution (Thermo Fisher Scientific), washed with FACS buffer  
427 containing 0.5% BSA and 0.02% sodium azide in phosphate-buffered saline (PBS), and stained  
428 with fluorescently-conjugated antibodies against HLA-A/B/C (clone W6/32; BioLegend), HLA-  
429 B, HLA-E, CD155/PVR, CD113/NECTIN3, MICA/B antibodies in FACS buffer at 4°C for 20  
430 min. For intracellular detection of IAV proteins, cells were processed using  
431 fixation/permeabilization buffers (BioLegend) and stained with a goat polyclonal anti-IAV  
432 antibody (Abcam; ab20841). Transfected cells were fixed in 1% paraformaldehyde without  
433 permeabilization and intracellular staining. After a final wash in FACS buffer, cells were  
434 analyzed on a BD LSRFortessa FACS analyzer.

#### 435 **Culture supernatant transfer experiments**

436 Media from IAV-infected, mock-infected, or transfected A549 cells was collected and  
437 exposed to 1200 J/m<sup>2</sup> UV light in a UV cross-linker to inactivate the virus. Naive A549 cells  
438 were treated with these culture supernatants for 17 h and cells were analyzed by flow cytometry  
439 as described above.

#### 440 **Statistical analyses**

441 Statistical significance for RT-qPCR and flow cytometry experiments were determined  
442 by two-way ANOVA with Sidak's post-hoc test unless otherwise stated. For luciferase assays,  
443 statistical significance was determined by a one-way ANOVA test with Tukey post-hoc test and  
444 a cut-off *P* value of 0.05. \* *p*<0.05, \*\* *p*<0.01, \*\*\* *p*<0.001, \*\*\*\* *p*<0.0001, and n.s., not  
445 significant.

#### 446 **Acknowledgements**

447 We thank members of the Makrigiannis and McCormick labs for critical reading of the  
448 manuscript. We thank Richard Webby (St. Jude Children's Research Hospital), Aartjan te  
449 Velthuis (Cambridge University) and Earl G. Brown (University of Ottawa) for reagents. We  
450 thank Derek Rowter and Renee Raudonis in the Dalhousie University Flow Cytometry Core

451 Facility for support. NZC was funded by a scholarship from Fonds de Recherche du Québec –  
452 Santé. This work was supported by Canadian Institutes for Health Research grants MOP-136817  
453 (to C.M.), MOP-155906 (to A.P.M) and MOP-130527 (to NG) and by National Institutes of  
454 Health R01 AI137358 (to M.M.G.).

455

## 456 REFERENCES

- 457 1. Iwasaki A, Pillai PS. 2014. Innate immunity to influenza virus infection. *Nat Rev Immunol*  
458 14:315–328.
- 459 2. Alexopoulou L, Holt AC, Medzhitov R, Flavell RA. 2001. Recognition of double-stranded  
460 RNA and activation of NF-kappaB by Toll-like receptor 3. *Nature* 413:732–738.
- 461 3. Pichlmair A, Schulz O, Tan CP, Näslund TI, Liljeström P, Weber F, Reis e Sousa C. 2006.  
462 RIG-I-mediated antiviral responses to single-stranded RNA bearing 5'-phosphates. *Science*  
463 314:997–1001.
- 464 4. Kato H, Takeuchi O, Sato S, Yoneyama M, Yamamoto M, Matsui K, Uematsu S, Jung A,  
465 Kawai T, Ishii KJ, Yamaguchi O, Otsu K, Tsujimura T, Koh C-S, Reis e Sousa C, Matsuura  
466 Y, Fujita T, Akira S. 2006. Differential roles of MDA5 and RIG-I helicases in the  
467 recognition of RNA viruses. *Nature* 441:101–105.
- 468 5. Le Goffic R, Pothlichet J, Vitour D, Fujita T, Meurs E, Chignard M, Si-Tahar M. 2007.  
469 Cutting Edge: Influenza A virus activates TLR3-dependent inflammatory and RIG-I-  
470 dependent antiviral responses in human lung epithelial cells. *J Immunol* 178:3368–3372.
- 471 6. Kowalinski E, Lunardi T, McCarthy AA, Luber J, Brunel J, Grigorov B, Gerlier D,  
472 Cusack S. 2011. Structural basis for the activation of innate immune pattern-recognition  
473 receptor RIG-I by viral RNA. *Cell* 147:423–435.
- 474 7. Lee M-K, Kim H-E, Park E-B, Lee J, Kim K-H, Lim K, Yum S, Lee Y-H, Kang S-J, Lee J-  
475 H, Choi B-S. 2016. Structural features of influenza A virus panhandle RNA enabling the  
476 activation of RIG-I independently of 5'-triphosphate. *Nucleic Acids Res* 44:8407–8416.
- 477 8. Liu G, Lu Y, Thulasi Raman SN, Xu F, Wu Q, Li Z, Brownlie R, Liu Q, Zhou Y. 2018.  
478 Nuclear-resident RIG-I senses viral replication inducing antiviral immunity. *Nat Commun*  
479 9:3199.
- 480 9. Seth RB, Sun L, Ea C-K, Chen ZJ. 2005. Identification and characterization of MAVS, a  
481 mitochondrial antiviral signaling protein that activates NF-kappaB and IRF 3. *Cell*  
482 122:669–682.
- 483 10. Dixit E, Boulant S, Zhang Y, Lee AS, Odendall C, Shum B, Hacohen N, Chen ZJ, Whelan  
484 SP, Franssen M, Nibert ML, Superti-Furga G, Kagan JC. 2010. Peroxisomes are signaling  
485 platforms for antiviral innate immunity. *Cell* 141:668.
- 486 11. Odendall C, Dixit E, Stavru F, Bierne H, Franz KM, Durbin AF, Boulant S, Gehrke L,  
487 Cossart P, Kagan JC. 2014. Diverse intracellular pathogens activate type III interferon  
488 expression from peroxisomes. *Nat Immunol* 15:717–726.

- 489 12. Jennings PA, Finch JT, Winter G, Robertson JS. 1983. Does the higher order structure of  
490 the influenza virus ribonucleoprotein guide sequence rearrangements in influenza viral  
491 RNA? *Cell* 34:619–627.
- 492 13. Coloma R, Valpuesta JM, Arranz R, Carrascosa JL, Ortín J, Martín-Benito J. 2009. The  
493 Structure of a Biologically Active Influenza Virus Ribonucleoprotein Complex. *PLOS*  
494 *Pathog* 5:e1000491.
- 495 14. Te Velthuis AJW, Long JC, Bauer DLV, Fan RLY, Yen H-L, Sharps J, Siegers JY, Killip  
496 MJ, French H, Oliva-Martín MJ, Randall RE, de Wit E, van Riel D, Poon LLM, Fodor E.  
497 2018. Mini viral RNAs act as innate immune agonists during influenza virus infection. *Nat*  
498 *Microbiol* 3:1234–1242.
- 499 15. Perez JT, Varble A, Sachidanandam R, Zlatev I, Manoharan M, García-Sastre A, tenOever  
500 BR. 2010. Influenza A virus-generated small RNAs regulate the switch from transcription  
501 to replication. *Proc Natl Acad Sci U S A* 107:11525–11530.
- 502 16. Ennis FA, Meager A, Beare AS, Qi YH, Riley D, Schwarz G, Schild GC, Rook AH. 1981.  
503 Interferon induction and increased natural killer-cell activity in influenza infections in man.  
504 *Lancet* 2:891–893.
- 505 17. Long BR, Michaelsson J, Loo CP, Ballan WM, Vu B-AN, Hecht FM, Lanier LL, Chapman  
506 JM, Nixon DF. 2008. Elevated frequency of gamma interferon-producing NK cells in  
507 healthy adults vaccinated against influenza virus. *Clin Vaccine Immunol* 15:120–130.
- 508 18. Zhou K, Wang J, Li A, Zhao W, Wang D, Zhang W, Yan J, Gao GF, Liu W, Fang M. 2016.  
509 Swift and Strong NK Cell Responses Protect 129 Mice against High-Dose Influenza Virus  
510 Infection. *J Immunol* 196:1842–1854.
- 511 19. Liu Y, Zheng J, Liu Y, Wen L, Huang L, Xiang Z, Lam K-T, Lv A, Mao H, Lau Y-L, Tu  
512 W. 2018. Uncompromised NK cell activation is essential for virus-specific CTL activity  
513 during acute influenza virus infection. *Cell Mol Immunol* 15:827–837.
- 514 20. Mandelboim O, Lieberman N, Lev M, Paul L, Arnon TI, Bushkin Y, Davis DM,  
515 Strominger JL, Yewdell JW, Porgador A. 2001. Recognition of haemagglutinins on virus-  
516 infected cells by NKp46 activates lysis by human NK cells. *Nature* 409:1055–1060.
- 517 21. Arnon TI, Lev M, Katz G, Chernobrov Y, Porgador A, Mandelboim O. 2001. Recognition  
518 of viral hemagglutinins by NKp44 but not by NKp30. *Eur J Immunol* 31:2680–2689.
- 519 22. Duev-Cohen A, Bar-On Y, Glasner A, Berhani O, Ophir Y, Levi-Schaffer F, Mandelboim  
520 M, Mandelboim O. 2016. The human 2B4 and NTB-A receptors bind the influenza viral  
521 hemagglutinin and co-stimulate NK cell cytotoxicity. *Oncotarget* 7:13093–13105.
- 522 23. Gazit R, Gruda R, Elboim M, Arnon TI, Katz G, Achdout H, Hanna J, Qimron U, Landau  
523 G, Greenbaum E, Zakay-Rones Z, Porgador A, Mandelboim O. 2006. Lethal influenza  
524 infection in the absence of the natural killer cell receptor gene *Ncr1*. *Nat Immunol* 7:517–  
525 523.
- 526 24. Glasner A, Zurunic A, Meninger T, Lenac Rovis T, Tsukerman P, Bar-On Y, Yamin R,  
527 Meyers AFA, Mandelboim M, Jonjic S, Mandelboim O. 2012. Elucidating the mechanisms  
528 of influenza virus recognition by *Ncr1*. *PloS One* 7:e36837.

- 529 25. Bar-On Y, Glasner A, Meninger T, Achdout H, Gur C, Lankry D, Vitenshtein A, Meyers  
530 AFA, Mandelboim M, Mandelboim O. 2013. Neuraminidase-mediated, NKp46-dependent  
531 immune-evasion mechanism of influenza viruses. *Cell Rep* 3:1044–1050.
- 532 26. Bar-On Y, Seidel E, Tsukerman P, Mandelboim M, Mandelboim O. 2014. Influenza virus  
533 uses its neuraminidase protein to evade the recognition of two activating NK cell receptors.  
534 *J Infect Dis* 210:410–418.
- 535 27. Lanier LL. 2005. NK cell recognition. *Annu Rev Immunol* 23:225–274.
- 536 28. Achdout H, Manaster I, Mandelboim O. 2008. Influenza virus infection augments NK cell  
537 inhibition through reorganization of major histocompatibility complex class I proteins. *J*  
538 *Virol* 82:8030–8037.
- 539 29. Mahmoud AB, Tu MM, Wight A, Zein HS, Rahim MMA, Lee S-H, Sekhon HS, Brown  
540 EG, Makrigiannis AP. 2016. Influenza Virus Targets Class I MHC-Educated NK Cells for  
541 Immuno-evasion. *PLoS Pathog* 12:e1005446.
- 542 30. Lanier LL. 1998. NK cell receptors. *Annu Rev Immunol* 16:359–393.
- 543 31. Hollaender A, Oliphant JW. 1944. The Inactivating Effect of Monochromatic Ultraviolet  
544 Radiation on Influenza Virus. *J Bacteriol* 48:447–454.
- 545 32. Keskinen P, Ronni T, Matikainen S, Lehtonen A, Julkunen I. 1997. Regulation of HLA  
546 class I and II expression by interferons and influenza A virus in human peripheral blood  
547 mononuclear cells. *Immunology* 91:421–429.
- 548 33. Glasner A, Oiknine-Djian E, Weisblum Y, Diab M, Panet A, Wolf DG, Mandelboim O.  
549 2017. Zika Virus Escapes NK Cell Detection by Upregulating Major Histocompatibility  
550 Complex Class I Molecules. *J Virol* 91.
- 551 34. Herzer K, Falk CS, Encke J, Eichhorst ST, Ulsenheimer A, Seliger B, Krammer PH. 2003.  
552 Upregulation of major histocompatibility complex class I on liver cells by hepatitis C virus  
553 core protein via p53 and TAP1 impairs natural killer cell cytotoxicity. *J Virol* 77:8299–  
554 8309.
- 555 35. Velazquez L, Fellous M, Stark GR, Pellegrini S. 1992. A protein tyrosine kinase in the  
556 interferon alpha/beta signaling pathway. *Cell* 70:313–322.
- 557 36. Müller M, Briscoe J, Laxton C, Guschin D, Ziemiecki A, Silvennoinen O, Harpur AG,  
558 Barbieri G, Witthuhn BA, Schindler C. 1993. The protein tyrosine kinase JAK1  
559 complements defects in interferon-alpha/beta and -gamma signal transduction. *Nature*  
560 366:129–135.
- 561 37. Watling D, Guschin D, Müller M, Silvennoinen O, Witthuhn BA, Quelle FW, Rogers NC,  
562 Schindler C, Stark GR, Ihle JN. 1993. Complementation by the protein tyrosine kinase  
563 JAK2 of a mutant cell line defective in the interferon-gamma signal transduction pathway.  
564 *Nature* 366:166–170.
- 565 38. Dumoutier L, Lejeune D, Hor S, Fickenscher H, Renauld J-C. 2003. Cloning of a new type  
566 II cytokine receptor activating signal transducer and activator of transcription (STAT)1,  
567 STAT2 and STAT3. *Biochem J* 370:391–396.

- 568 39. Sheppard P, Kindsvogel W, Xu W, Henderson K, Schlutsmeyer S, Whitmore TE, Kuestner  
569 R, Garrigues U, Birks C, Roraback J, Ostrand C, Dong D, Shin J, Presnell S, Fox B,  
570 Haldeman B, Cooper E, Taft D, Gilbert T, Grant FJ, Tackett M, Krivan W, McKnight G,  
571 Clegg C, Foster D, Klucher KM. 2003. IL-28, IL-29 and their class II cytokine receptor IL-  
572 28R. *Nat Immunol* 4:63–68.
- 573 40. Khaperskyy DA, Hatchette TF, McCormick C. 2012. Influenza A virus inhibits cytoplasmic  
574 stress granule formation. *FASEB J* 26:1629–1639.
- 575 41. Gack MU, Shin YC, Joo C-H, Urano T, Liang C, Sun L, Takeuchi O, Akira S, Chen Z,  
576 Inoue S, Jung JU. 2007. TRIM25 RING-finger E3 ubiquitin ligase is essential for RIG-I-  
577 mediated antiviral activity. *Nature* 446:916–920.
- 578 42. Khaperskyy DA, Emara MM, Johnston BP, Anderson P, Hatchette TF, McCormick C.  
579 2014. Influenza A Virus Host Shutoff Disables Antiviral Stress-Induced Translation Arrest.  
580 *PLOS Pathog* 10:e1004217.
- 581 43. Katz DH, Hamaoka T, Dorf ME, Benacerraf B. 1973. Cell Interactions Between  
582 Histoincompatible T and B Lymphocytes. The H-2 Gene Complex Determines Successful  
583 Physiologic Lymphocyte Interactions\*. *Proc Natl Acad Sci U S A* 70:2624–2628.
- 584 44. Zinkernagel RM, Doherty PC. 1974. Restriction of in vitro T cell-mediated cytotoxicity in  
585 lymphocytic choriomeningitis within a syngeneic or semiallogeneic system. *Nature*  
586 248:701–702.
- 587 45. Colonna M, Borsellino G, Falco M, Ferrara GB, Strominger JL. 1993. HLA-C is the  
588 inhibitory ligand that determines dominant resistance to lysis by NK1- and NK2-specific  
589 natural killer cells. *Proc Natl Acad Sci U S A* 90:12000–12004.
- 590 46. Hoare HL, Sullivan LC, Pietra G, Clements CS, Lee EJ, Ely LK, Beddoe T, Falco M, Kjer-  
591 Nielsen L, Reid HH, McCluskey J, Moretta L, Rossjohn J, Brooks AG. 2006. Structural  
592 basis for a major histocompatibility complex class Ib-restricted T cell response. *Nat*  
593 *Immunol* 7:256–264.
- 594 47. King NJ, Kesson AM. 1988. Interferon-independent increases in class I major  
595 histocompatibility complex antigen expression follow flavivirus infection. *J Gen Virol* 69 (  
596 Pt 10):2535–2543.
- 597 48. Shen J, T-To SS, Schrieber L, King NJ. 1997. Early E-selectin, VCAM-1, ICAM-1, and  
598 late major histocompatibility complex antigen induction on human endothelial cells by  
599 flavivirus and comodulation of adhesion molecule expression by immune cytokines. *J Virol*  
600 71:9323–9332.
- 601 49. Müllbacher A, Lobigs M. 1995. Up-regulation of MHC class I by flavivirus-induced  
602 peptide translocation into the endoplasmic reticulum. *Immunity* 3:207–214.
- 603 50. Arase H, Mocarski ES, Campbell AE, Hill AB, Lanier LL. 2002. Direct recognition of  
604 cytomegalovirus by activating and inhibitory NK cell receptors. *Science* 296:1323–1326.
- 605 51. Momburg F, Müllbacher A, Lobigs M. 2001. Modulation of transporter associated with  
606 antigen processing (TAP)-mediated peptide import into the endoplasmic reticulum by  
607 flavivirus infection. *J Virol* 75:5663–5671.



- 608 52. Chazal M, Beauclair G, Gracias S, Najburg V, Simon-Lorière E, Tangy F, Komarova AV,  
609 Jovenet N. 2018. RIG-I Recognizes the 5' Region of Dengue and Zika Virus Genomes.  
610 Cell Rep 24:320–328.
- 611 53. Wang B, Niu D, Lai L, Ren EC. 2013. p53 increases MHC class I expression by  
612 upregulating the endoplasmic reticulum aminopeptidase ERAP1. Nat Commun 4:2359.
- 613 54. Dehairs J, Talebi A, Cherifi Y, Swinnen JV. 2016. CRISP-ID: decoding CRISPR mediated  
614 indels by Sanger sequencing. Sci Rep 6:1–5.
- 615 55. Hoffmann E, Neumann G, Kawaoka Y, Hobom G, Webster RG. 2000. A DNA transfection  
616 system for generation of influenza A virus from eight plasmids. Proc Natl Acad Sci  
617 97:6108–6113.
- 618 56. Matrosovich M, Matrosovich T, Garten W, Klenk H-D. 2006. New low-viscosity overlay  
619 medium for viral plaque assays. Virol J 3:63.
- 620 57. Kruse V, Hamann C, Monecke S, Cyganek L, Elsner L, Hübscher D, Walter L, Streckfuss-  
621 Bömeke K, Guan K, Dressel R. 2015. Human Induced Pluripotent Stem Cells Are Targets  
622 for Allogeneic and Autologous Natural Killer (NK) Cells and Killing Is Partly Mediated by  
623 the Activating NK Receptor DNAM-1. PloS One 10:e0125544.
- 624 58. Remoli ME, Giacomini E, Lutfalla G, Dondi E, Orefici G, Battistini A, Uzé G, Pellegrini S,  
625 Coccia EM. 2002. Selective expression of type I IFN genes in human dendritic cells  
626 infected with Mycobacterium tuberculosis. J Immunol 169:366–374.
- 627 59. Wang F, Xu L, Feng X, Guo D, Tan W, Zhang M. 2012. Interleukin-29 modulates  
628 proinflammatory cytokine production in synovial inflammation of rheumatoid arthritis.  
629 Arthritis Res Ther 14:R228.
- 630 60. Hillyer P, Mane VP, Schramm LM, Puig M, Verthelyi D, Chen A, Zhao Z, Navarro MB,  
631 Kirschman KD, Bykadi S, Jubin RG, Rabin RL. 2012. Expression profiles of human  
632 interferon-alpha and interferon-lambda subtypes are ligand- and cell-dependent. Immunol  
633 Cell Biol 90:774–783.

634  
635

## 636 **FIGURE LEGENDS**

637

### 638 **Figure 1. IAV infection of epithelial cells increases class I HLA gene expression. (A)**

639 Expression of NK cell ligands from 18 publicly available gene expression datasets from *in vitro*  
640 IAV infection of A549 cells and primary human lung cells. NK ligands are classified as  
641 activating (green), ambiguous function (orange) and inhibitory (red). Data is presented as the  
642  $\log_2$  fold change relative to uninfected controls for each dataset; median values with interquartile  
643 range (IQR) are shown. B) A549 cells were infected with PR8, FM-MA or mock-infected for 17  
644 h and RNA was harvested for RT-qPCR. Relative expression of NK cell ligands was expressed  
645 as  $\log_2$  fold change relative to mock-infected controls. N=3; \*  $p<0.05$ , \*\*  $p<0.01$ , \*\*\*  $p<0.001$ .



646 **Figure 2. IAV infection alters cell surface expression of ligands for NK cell receptors.** A549  
647 cells were infected with FM-MA or PR8 at MOI=1. At 17 h, cells were fixed and immunostained  
648 to determine cell surface levels of NK cell ligands; cells were subsequently permeabilized for  
649 immunostaining of intracellular IAV proteins. (A) Flow cytometry analysis of cells  
650 immunostained with a pan-HLA-A/B/C antibody, or antibodies specific for class I HLA proteins  
651 HLA-B, HLA-C or HLA-E or isotype antibody controls. (B) Flow cytometry analysis for cells  
652 immunostained with antibodies to detect ligands for activating NK cell receptors; CD155/PVR,  
653 CD113/NECTIN3 and MICA/B or isotype antibody controls. Representative histograms (top  
654 panels) show results of a single experiment; vertical line indicates expression level of target in  
655 uninfected cells. Bottom panels show Mean Fluorescence Intensity (MFI) relative to uninfected  
656 cells. Each data point represents an independent experiment. Means and  $\pm$ SD are shown. \*  
657  $p<0.05$ , \*\*  $p<0.01$ , \*\*\*  $p<0.001$ , \*\*\*\*  $p<0.0001$ .

658 **Figure 3. Defective viral RNAs increase surface HLA presentation in a MAVS-dependent**  
659 **manner.** (A) FM-MA inoculum was exposed to UV light prior to infection of A549 cells at  
660 MOI=1. At 17 hpi, cells were fixed and immunostained with a pan-anti-HLA-A/B/C antibody or  
661 an anti-HLA-B antibody and processed for flow cytometry. Vertical line indicates HLA  
662 expression level in uninfected cells. Representative data from one out of two independent  
663 experiments is shown. (B) A549 cells were transfected with full length (FL) vRNA, defective  
664 interfering (DI) vRNA or mini-viral RNA (mvRNA) minireplicons derived from the indicated  
665 genome segments. An ISRE-driven firefly luciferase reporter plasmid was co-transfected to  
666 measure IFN signaling, along with a Renilla luciferase plasmid that served as normalization  
667 control. Poly(I:C) and empty pUC19 plasmid served as positive and negative controls,  
668 respectively. Firefly luciferase activity was normalized to Renilla luciferase control for each  
669 sample, and data was expressed as fold change compared to pUC19 plasmid transfection ( $n=6$ ,  
670 \* $p<0.05$ ; IQR Boxes and SD whiskers are shown). (C) A549 cells or A549 MAVS-KO cells  
671 were transfected with IAV minireplicon expressing defective vRNAs from genome segment 5, as  
672 in (B), and analyzed by flow cytometry at 48 h post-transfection via surface immunostaining  
673 with a pan-anti-HLA-A/B/C antibody ( $n=3$ ). Histograms from a representative experiment are  
674 shown on the left; vertical line indicates expression level of target in uninfected cells. On the  
675 right, relative MFI values from at least 3 independent experiments are shown.

676 **Figure 4. Class I HLA upregulation in IAV-infected cells is MAVS-dependent.** A549 cells or  
677 A549-MAVS-KO cells were infected with FM-MA at an MOI=1. RNA was harvested for RT-  
678 qPCR at 3 hpi or 17 hpi. (A) Relative fold change in HLA-A, -B and -C transcript levels in A549  
679 cells or A549-MAVS-KO cells at 17 hpi (n=3). (B) Relative fold change in B2M, TAP and  
680 PSMB8 transcript levels in A549 and A549 MAVS-KO cells at 3 hpi or 17 hpi (n=3). (C) A549  
681 cells and A549-MAVS-KO cells were infected with FM-MA and harvested at 17 hpi for flow  
682 cytometry analysis. Histograms from a representative experiment are shown. Relative MFI of  
683 cell surface HLA proteins in FM-MA infected A549 cells and A549-MAVS-KO cells at  
684 indicated times, relative to uninfected controls.

685 **Figure 5. Defective IAV RNAs elicit cell-intrinsic and paracrine upregulation of class I**  
686 **HLA proteins.** (A) A549 cells were treated with conditioned medium containing UV-inactivated  
687 culture supernatant from FM-MA-infected cells. Surface HLA levels on recipient cells (17 h  
688 post-treatment) and infected donor cells (17 hpi) were determined by flow cytometry.  
689 Histograms from a representative experiment are shown. Vertical dashed-line indicates  
690 expression level in uninfected cells. (B) MFI of cell surface HLA proteins on recipient cells from  
691 (A) relative to cells treated with conditioned media from mock-infected cells. Each data point  
692 represents an independent experiment. (C) A549 cells were treated with conditioned medium  
693 from cells transfected with IAV minireplicon expressing defective vRNAs from genome segment  
694 5 or from control untransfected cells or pUC19 vector-transfected cells. After 24 h, cells were  
695 fixed and immunostained with a pan-anti-HLA-A/B/C antibody (n=3). Histograms from a  
696 representative experiment are shown on the left; vertical line indicates expression level of target  
697 in uninfected cells. On the right, relative MFI values from at least 3 independent experiments are  
698 shown (\*p<0.05).

699 **Figure 6. HLA upregulation in response to defective IAV RNAs is dependent on IFN**  
700 **signaling.** (A) A549 cells or A549-MAVS-KO cells were infected with FM-MA for 17 h and  
701 relative levels of IFN- $\beta$  and IFN- $\lambda$ 1 transcripts compared to uninfected controls were analyzed  
702 by RT-qPCR (n=3). (B) A549 cells or A549-MAVS-KO cells were treated with recombinant  
703 IFN- $\beta$ , IFN- $\lambda$ 1 or IFN- $\lambda$ 2 and RNA was harvested over a 12 h time course. Relative expression  
704 of HLA-A, -B and -C transcripts was analyzed RT-qPCR. (C) Surface expression of HLA-  
705 A/B/C was determined by immunostaining and flow cytometry of cells harvested over the time  
706 course of IFN treatment described in (B) (n=3). (D) Analysis of HLA surface expression on

707 A549 cells transfected with IAV minireplicon expressing defective vRNAs from genome  
708 segment 5 or from control pUC19 vector-transfected cells. Immediately after transfection, cells  
709 were treated with 5  $\mu$ M Ruxolitinib (Rux; Invivogen) or mock-treated. \*  $p < 0.05$ , \*\*  $p < 0.01$ , \*\*\*  
710  $p < 0.001$ .

711

712 **Figure 7. NS1 protein limits cell-intrinsic and paracrine upregulation of class I HLA**  
713 **proteins.** (A) A diagram representing wild type and mutant NS1 proteins used in this study. A  
714 carboxy-terminal disordered tail region present in PR8 NS1 and absent in FM-MA NS1 is shown  
715 in grey. Positions of alanine substitutions in R38A,K41A and E96A,E97A mutant proteins are  
716 indicated as 'AA'. Amino-terminal dsRNA binding domain is in orange; effector domain is in  
717 teal. (B) A549 cells were infected with the indicated viruses at an MOI=1 or mock-infected. At  
718 17 hpi, cell supernatants were collected prior to cell fixation, and transferred to naïve A549 cells  
719 for an additional 17 h incubation prior to fixation. Donor and recipient cells were immunostained  
720 with the indicated anti-HLA antibodies to determine cell surface levels of NK cell ligands; cells  
721 were subsequently permeabilized for immunostaining of intracellular IAV proteins and analyzed  
722 by flow cytometry. Top panels show data from donor infected or mock-infected cells. Bottom  
723 panels show data from cells exposed to conditioned media. Data is presented as MFI relative to  
724 uninfected cells or conditioned media treatment from uninfected cells. Each data point represents  
725 an independent experiment. Means and  $\pm$ SD are shown. \*  $p < 0.05$ , \*\*  $p < 0.01$ , \*\*\*  $p < 0.001$ .

**Table 1.** Primer sequences for RT-qPCR analysis

| <b>RT-qPCR target</b>     | <b>Primer sequences (5'-3')</b>                             | <b>Source</b>     |
|---------------------------|-------------------------------------------------------------|-------------------|
| HLA-A                     | F - CGACGCCGCGAGCCAGA<br>R - GCGATGTAATCCTTGCCGTCGTAG       | (57)              |
| HLA-B                     | F - GACGGCAAGGATTACATCGCCCTGAA<br>R - CACGGGCCGCTCCCACT     | (57)              |
| HLA-C                     | F - GGAGACACAGAAGTACAAGCG<br>R - CGTCGTAGGCGTACTGGTCATA     | (57)              |
| HLA-E                     | F - CCTACGACGGCAAGGA<br>R - CCCTTCTCCAGGTATTTGTG            | (57)              |
| MIC-A                     | F - ACTTGACAGGGAACGGAAAGGA<br>R - CCATCGTAGTAGAAATGCTGGGA   | (57)              |
| MIC-B                     | F - ATCTGTGCAGTCAGGGTTTCTC<br>R - TGAGGTCTTGCCCACTCTCTGT    | (57)              |
| PVR                       | F - GCTCTGCTGTTTGTCTGCTTTCC<br>R - TTTCTGCTGCTGGATGCGGTTT   | (57)              |
| NECTIN1                   | F - ACTACCACATGGACCGCTTC<br>R - GTTGATGGGTCCCTTGAAGA        | Designed in-house |
| NECTIN2                   | F - TGGACTGGGAAGCCAAAGAGA<br>R - TACAGAGAGGGTCACAGGTATCAGG  | (57)              |
| NECTIN3                   | F - GTTACATTCCCGCTTGAAAA<br>R - CCCAGTCAATATGTGCAACG        | Designed in-house |
| CADM1                     | F - GGTGGAAGAGTGGTCAGACA<br>R - CTTCCCGATGGCTTCACATG        | Designed in-house |
| CDH1                      | F - AGGAATCCAAAGCCTCAGGT<br>R - ACCCACCTCTAAGGCCATCT        | Designed in-house |
| CDH2                      | F - GAGGCAGAGACTTGCAGAAC<br>R - CCATTAAGCCGAGTGATGGT        | Designed in-house |
| PCNA                      | F - CGGATACCTTGGCGCTAGTA<br>R - CACTCCGCTTTTGCACAGG         | Designed in-house |
| CD27L                     | F - TGGTACACATCCAGGTGACG<br>R - AGGCAATGGTACAACCTTGG        | Designed in-house |
| IFN- $\beta$              | F - GTCTCCTCCA AATTGCTCTC<br>R - ACAGGAGCTTCTGACACTGA       | (58)              |
| IFN- $\lambda$ 1 (IL-29)  | F - GAAGCAGTTGCGATTTAGCC<br>R - GAAGCTCGCTAGCTCCTGTG        | (59)              |
| IFN- $\lambda$ 2 (IL-28A) | F - GCCAAAGATGCCTTAGAAGAG<br>R - CAGAACCTTCAGCGTCAGG        | (60)              |
| 5s rRNA                   | F - GCCCGATCTCGTCTGATCT<br>R - AGCCTACAGCACCCGGTAT          | Designed in-house |
| GAPDH                     | F - ACGAATTTGGCTACAGCAACAGGG<br>R - TCTACATGGCAACTGTGAGGAGG | (37)              |

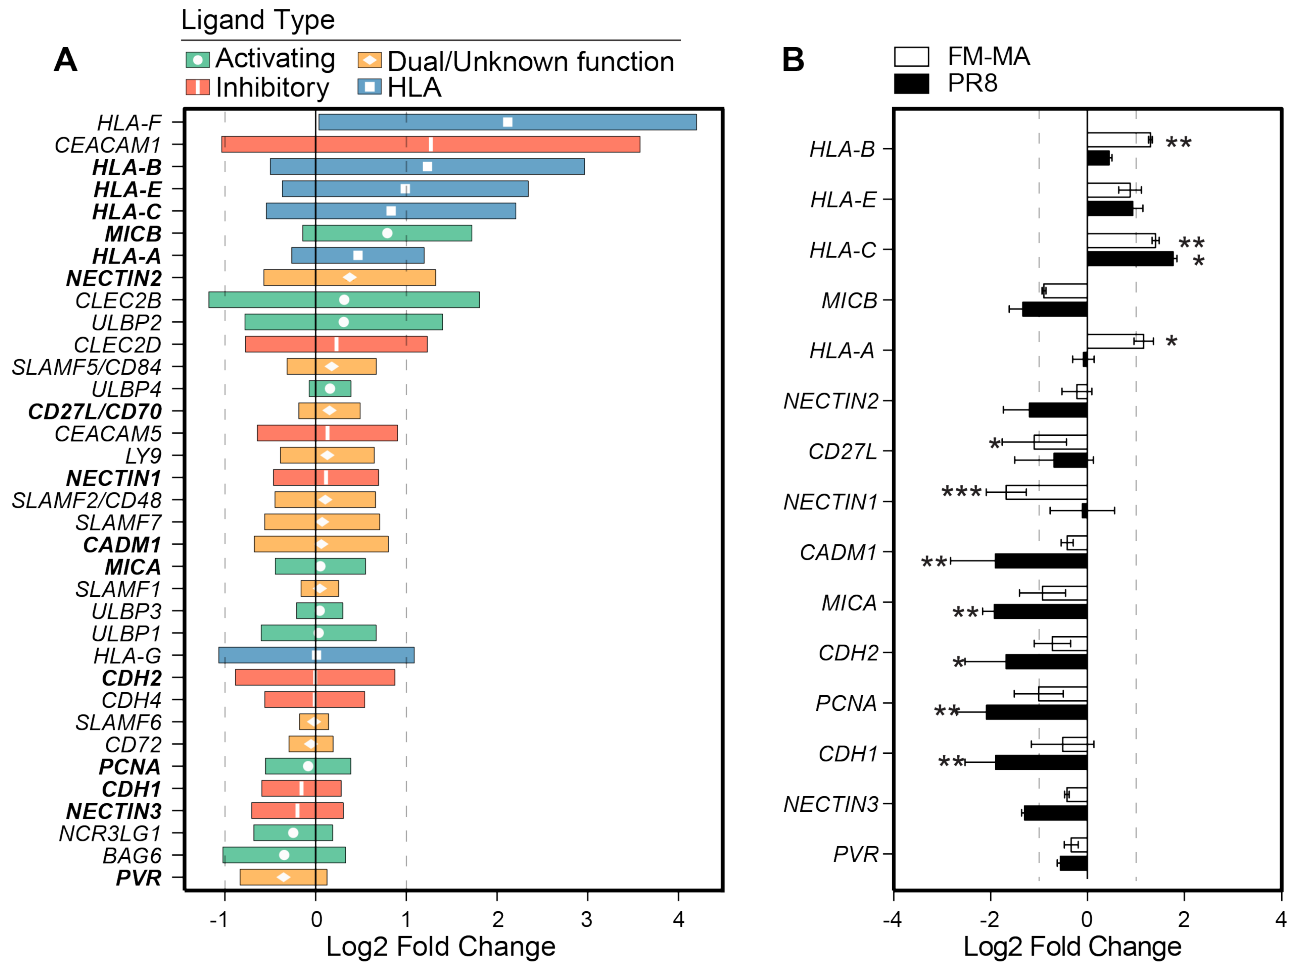

**Figure 1. IAV infection of epithelial cells increases class I HLA gene expression.** (A) Expression of NK cell ligands from 18 publicly available gene expression datasets from *in vitro* IAV infection of A549 cells and primary human lung cells. NK ligands are classified as activating (green), ambiguous function (orange) and inhibitory (red). Class I HLA proteins are indicated in blue. Data is presented as the log<sub>2</sub> fold change relative to uninfected controls for each dataset; median values with interquartile range (IQR) are shown. Vertical dashed lines indicate 2-fold change thresholds. (B) A549 cells were infected with PR8, FM-MA or mock-infected for 17 h and RNA was harvested for RT-qPCR. Relative expression of NK cell ligands was expressed as log<sub>2</sub> fold change relative to mock-infected controls. Vertical dashed lines indicate 2-fold change thresholds. N=3; \* p<0.05, \*\* p<0.01, \*\*\* p<0.001.

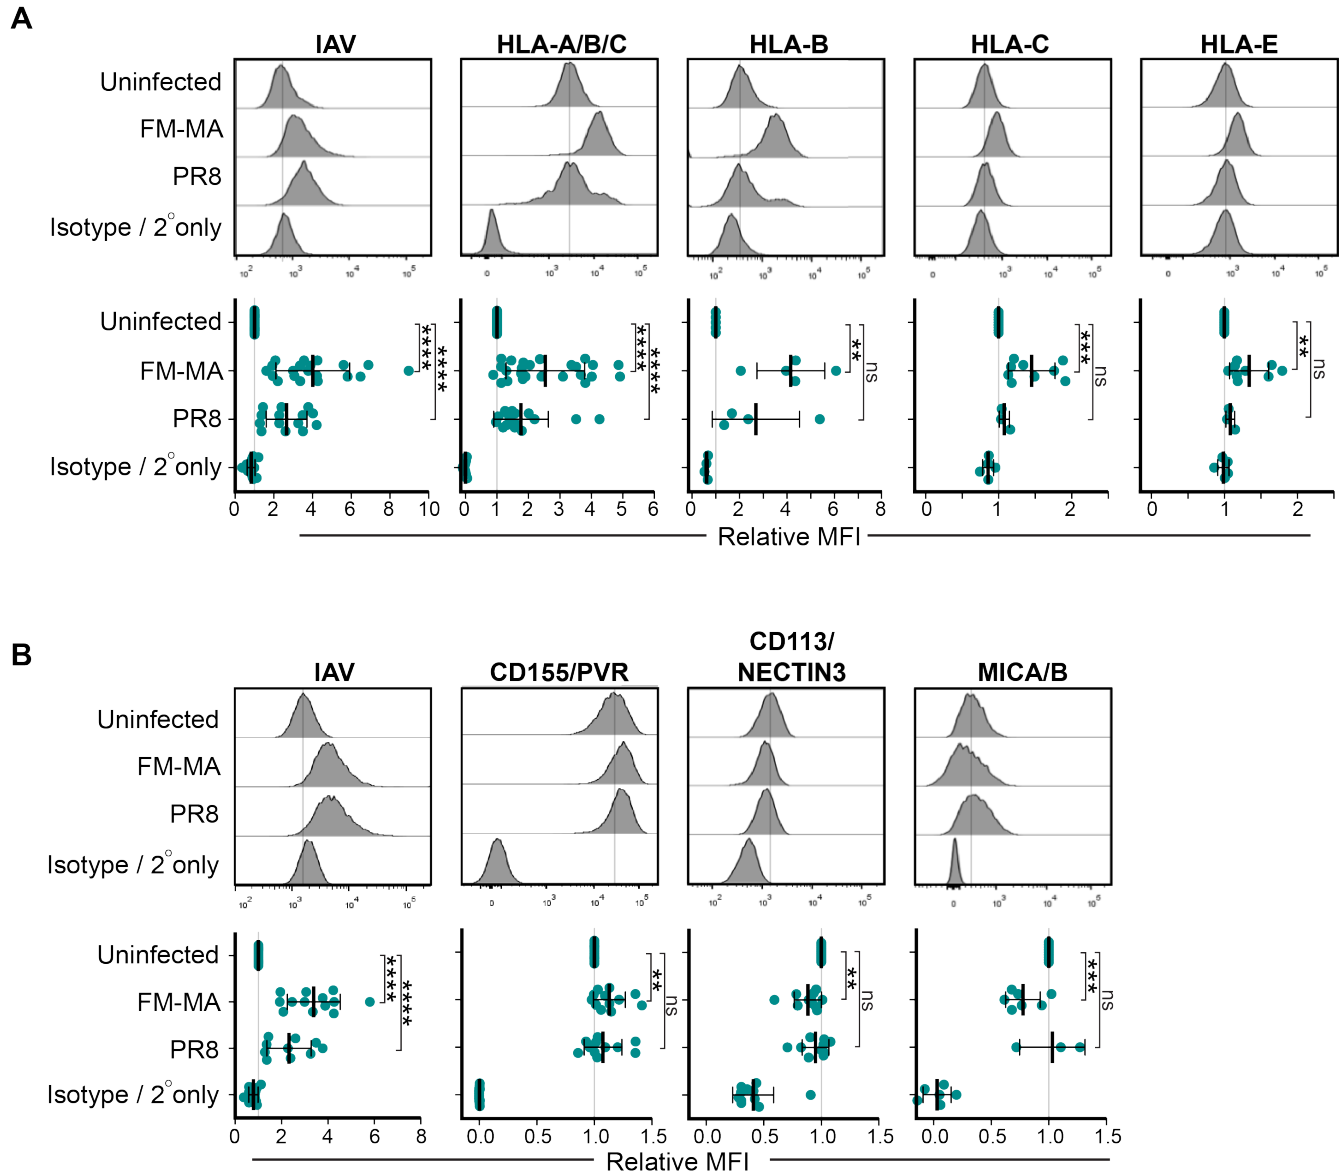

**Figure 2. IAV infection alters cell surface expression of ligands for NK cell receptors.** A549 cells were infected with FM-MA or PR8 at MOI=1. At 17 h, cells were fixed and immunostained to determine cell surface levels of NK cell ligands; cells were subsequently permeabilized for immunostaining of intracellular IAV proteins. (A) Flow cytometry analysis of cells immunostained with a pan-HLA-A/B/C antibody, or antibodies specific for class I HLA proteins HLA-B, HLA-C or HLA-E or isotype antibody controls. (B) Flow cytometry analysis for cells immunostained with antibodies to detect ligands for activating NK cell receptors; CD155/PVR, CD113/NECTIN3 and MICA/B or isotype antibody controls. Representative histograms (top panels) show results of a single experiment; vertical line indicates expression level of target in uninfected cells. Bottom panels show Mean Fluorescence Intensity (MFI) relative to uninfected cells. Each data point represents an independent experiment. Means and  $\pm$ SD are shown. \*  $p < 0.05$ , \*\*  $p < 0.01$ , \*\*\*  $p < 0.001$ , \*\*\*\*  $p < 0.0001$ .



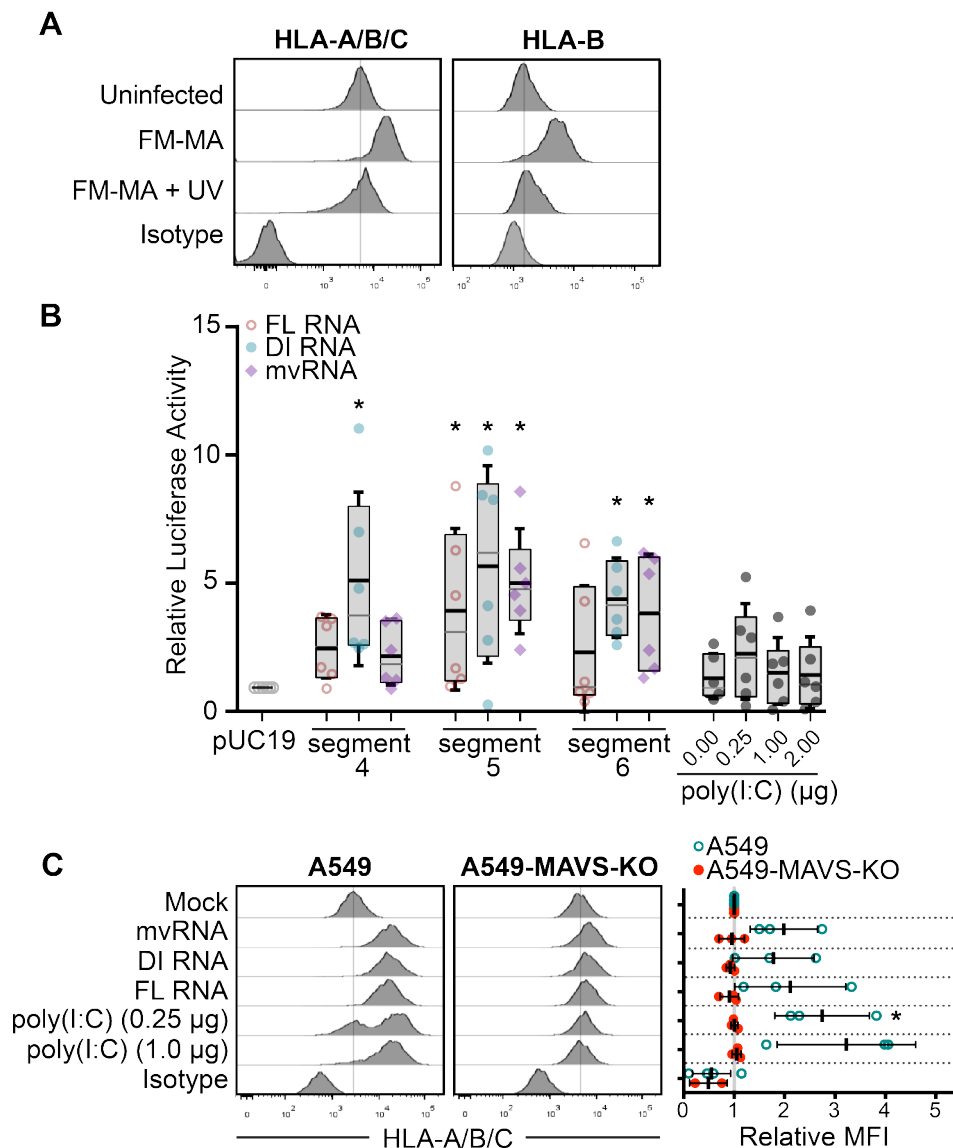

**Figure 3. Defective viral RNAs increase surface HLA presentation in a MAVS-dependent manner.** (A) FM-MA inoculum was exposed to UV light prior to infection of A549 cells at MOI=1. At 17 hpi, cells were fixed and immunostained with a pan-anti-HLA-A/B/C antibody or an anti-HLA-B antibody and processed for flow cytometry. Vertical line indicates HLA expression level in uninfected cells. Representative data from one out of two independent experiments is shown. (B) A549 cells were transfected with full length (FL) vRNA, defective interfering (DI) vRNA or mini-viral RNA (mvRNA) minireplicons derived from the indicated genome segments. An ISRE-driven firefly luciferase reporter plasmid was co-transfected to measure IFN signaling, along with a Renilla luciferase plasmid that served as normalization control. Poly(I:C) and empty pUC19 plasmid served as positive and negative controls, respectively. Firefly luciferase activity was normalized to Renilla luciferase control for each sample, and data was expressed as fold change compared to pUC19 plasmid transfection ( $n=6$ ,  $*p<0.05$ ; IQR Boxes and SD whiskers are shown). (C) A549 cells or A549 MAVS-KO cells were transfected with IAV minireplicon expressing defective vRNAs from genome segment 5, as in (B), and analyzed by flow cytometry at 48 h post-transfection via surface immunostaining with a pan-anti-HLA-A/B/C antibody ( $n=3$ ). Histograms from a representative experiment are shown on the left; vertical line indicates expression level of target in uninfected cells. On the right, relative MFI values from at least 3 independent experiments are shown.

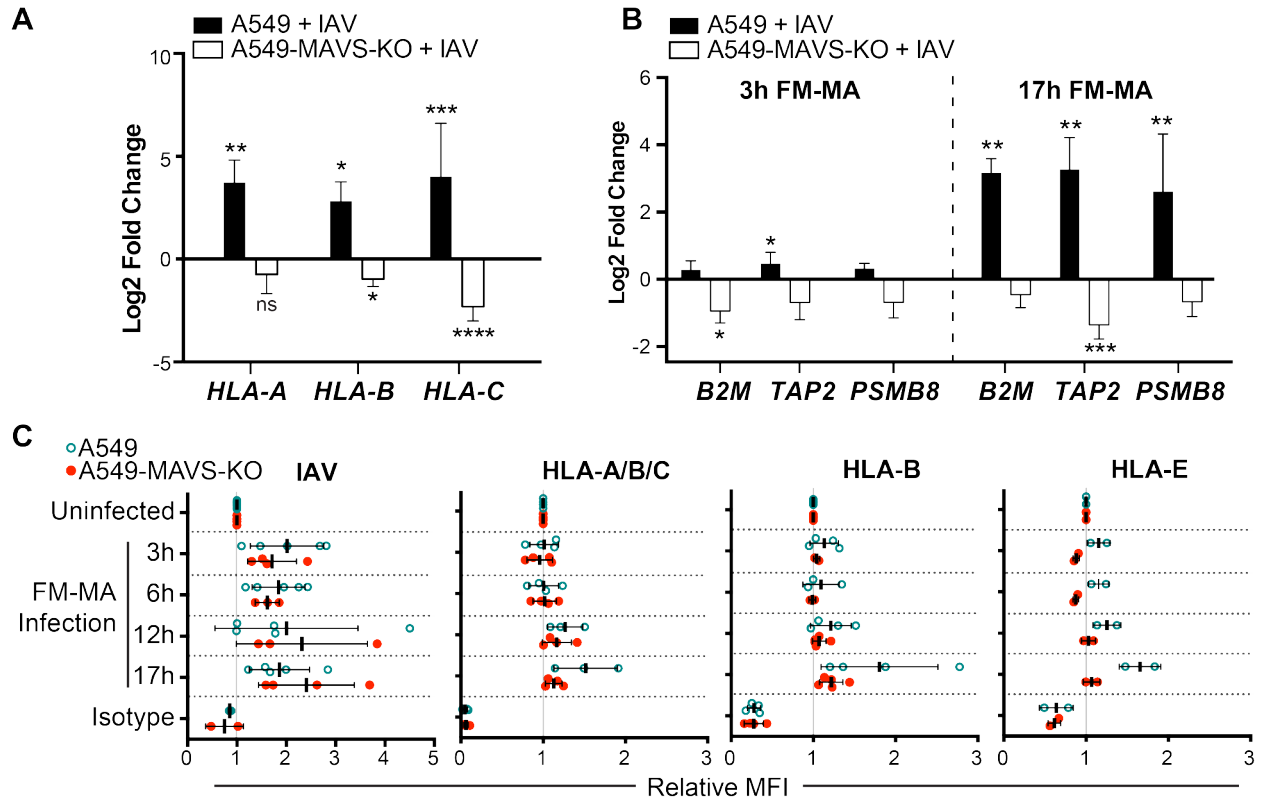

**Figure 4. Class I HLA upregulation in IAV-infected cells is MAVS-dependent.** A549 cells or A549-MAVS-KO cells were infected with FM-MA at an MOI=1. RNA was harvested for RT-qPCR at 3 hpi or 17 hpi. (A) Relative fold change in HLA-A, -B and -C transcript levels in A549 cells or A549-MAVS-KO cells at 17 hpi (n=3). (B) Relative fold change in B2M, TAP and PSMB8 transcript levels in A549 and A549 MAVS-KO cells at 3 hpi or 17 hpi (n=3). (C) Relative MFI of cell surface HLA proteins in FM-MA infected A549 cells and A549-MAVS-KO cells at indicated times, relative to uninfected controls.

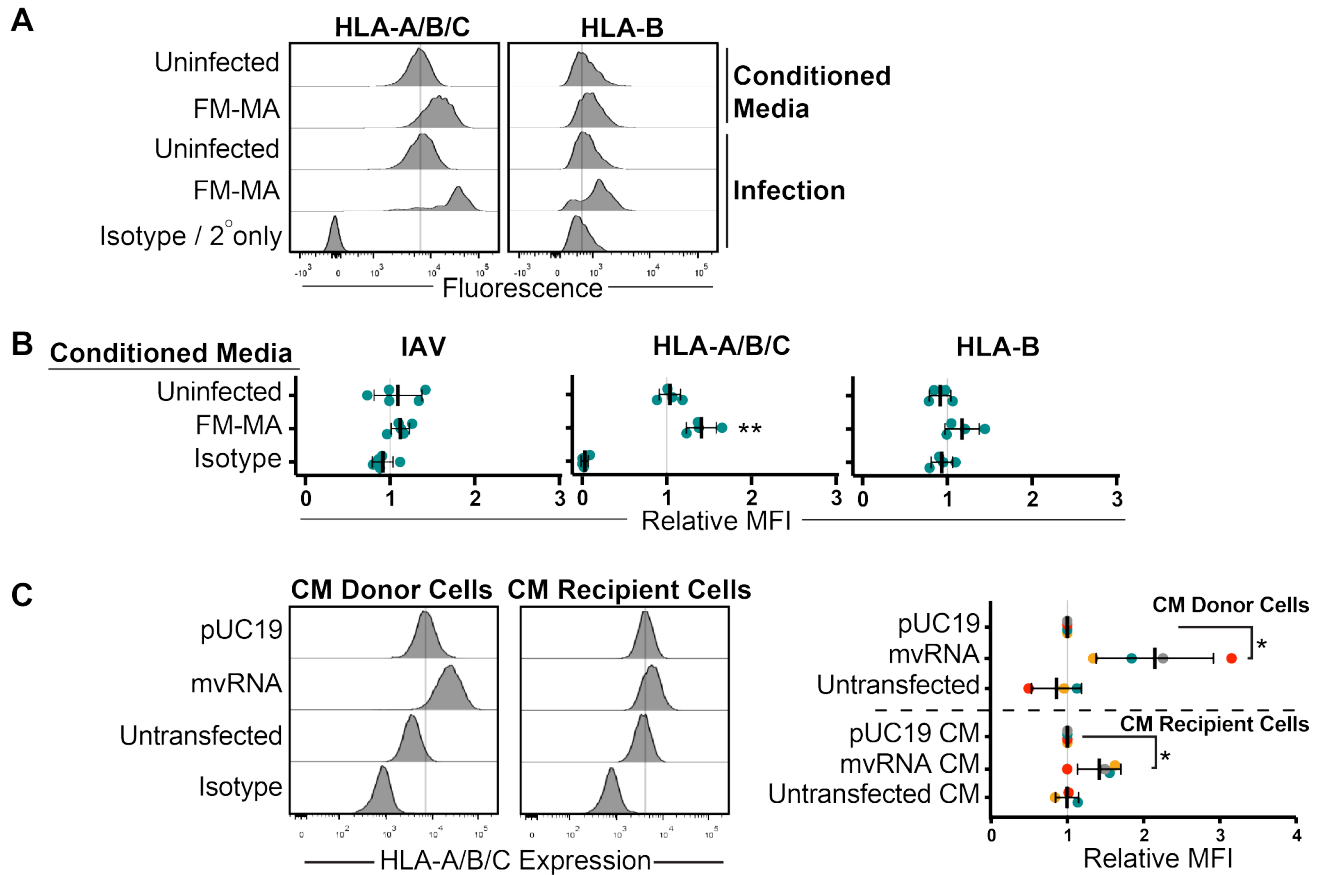

**Figure 5. Defective IAV RNAs elicit cell-intrinsic and paracrine upregulation of class I HLA proteins.** (A) A549 cells were treated with conditioned medium containing UV-inactivated culture supernatant from FM-MA-infected cells. Surface HLA levels on recipient cells (17 h post-treatment) and infected donor cells (17 hpi) were determined by flow cytometry. Histograms from a representative experiment are shown. Vertical dashed-line indicates expression level in uninfected cells. (B) MFI of cell surface HLA proteins on recipient cells from (A) relative to cells treated with conditioned media from mock-infected cells. Each data point represents an independent experiment. (C) A549 cells were treated with conditioned medium from cells transfected with IAV minireplicon expressing defective vRNAs from genome segment 5 or from control untransfected cells or pUC19 vector-transfected cells. After 24 h, cells were fixed and immunostained with a pan-anti-HLA-A/B/C antibody (n=3). Histograms from a representative experiment are shown on the left; vertical line indicates expression level of target in uninfected cells. On the right, relative MFI values from at least 3 independent experiments are shown (\*p<0.05).

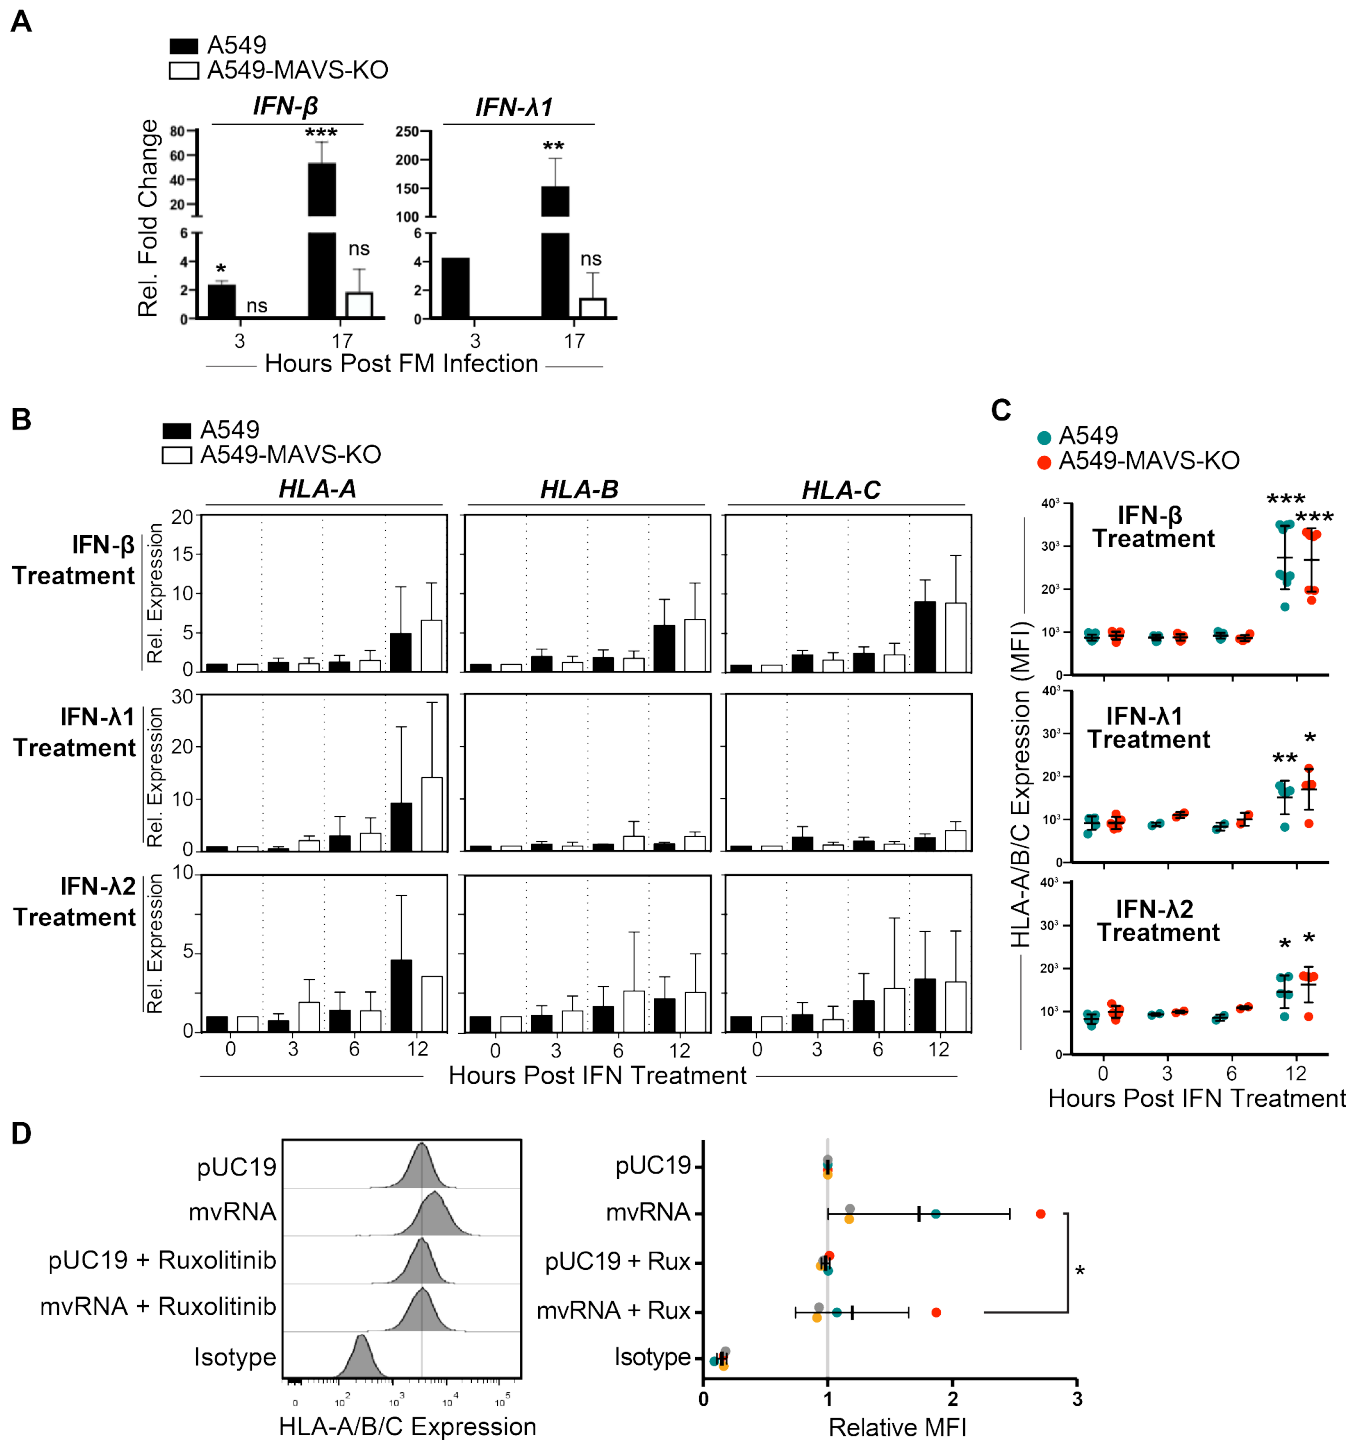

**Figure 6. HLA upregulation in response to defective IAV RNAs is dependent on IFN signaling.** (A) A549 cells or A549-MAVS-KO cells were infected with FM-MA for 17 h and relative levels of IFN- $\beta$  and IFN- $\lambda$ 1 transcripts compared to uninfected controls were analyzed by RT-qPCR (n=3). (B) A549 cells or A549-MAVS-KO cells were treated with recombinant IFN- $\beta$ , IFN- $\lambda$ 1 or IFN- $\lambda$ 2 and RNA was harvested over a 12 h time course. Relative expression of HLA-A, -B and -C transcripts was analyzed RT-qPCR. (C) Surface expression of HLA-A/B/C was determined by immunostaining and flow cytometry of cells harvested over the time course of IFN treatment described in (B) (n=3). (D) Analysis of HLA surface expression on A549 cells transfected with IAV minireplicon expressing defective vRNAs from genome segment 5 or from control pUC19 vector-transfected cells. Immediately after transfection, cells were treated with Ruxolitinib (Rux) or mock-treated. \* p<0.05, \*\* p<0.01, \*\*\* p<0.001.

**A**

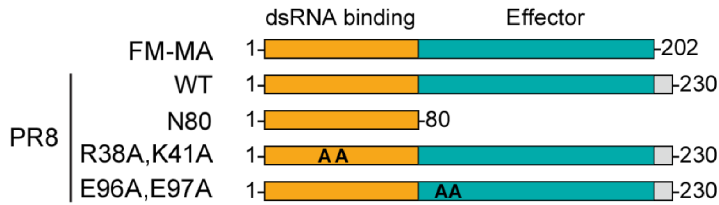

**B**

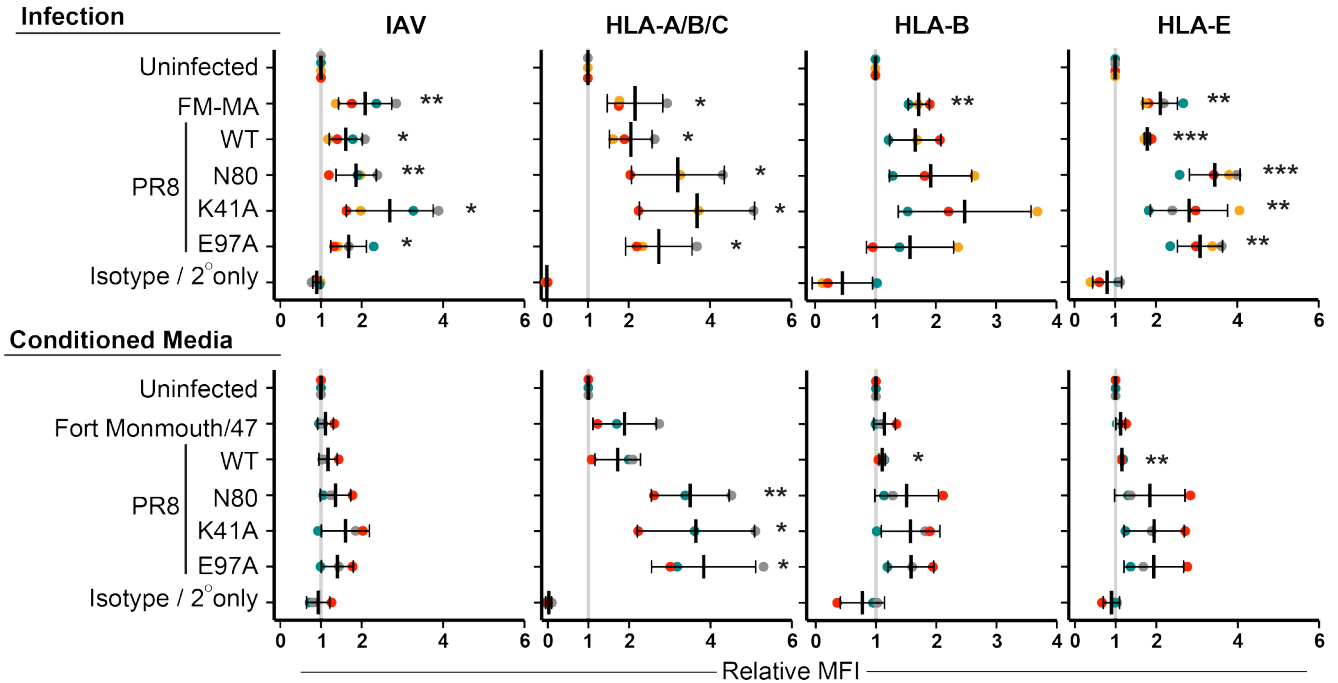

**Figure 7. NS1 protein limits cell-intrinsic and paracrine upregulation of class I HLA proteins.** (A) A diagram representing wild type and mutant NS1 proteins used in this study. A carboxy-terminal disordered tail region present in PR8 NS1 and absent in FM-MA NS1 is shown in grey. Positions of alanine substitutions in R38A,K41A and E96A,E97A mutant proteins are indicated as ‘AA’. Amino-terminal dsRNA binding domain is in orange; effector domain is in teal. (B) A549 cells were infected with the indicated viruses at an MOI=1 or mock-infected. At 17 hpi, cell supernatants were collected prior to cell fixation, and transferred to naïve A549 cells for an additional 17 h incubation prior to fixation. Donor and recipient cells were immunostained with the indicated anti-HLA antibodies to determine cell surface levels of NK cell ligands; cells were subsequently permeabilized for immunostaining of intracellular IAV proteins and analyzed by flow cytometry. Top panels show data from donor infected or mock-infected cells. Bottom panels show data from cells exposed to conditioned media. Data is presented as MFI relative to uninfected cells or conditioned media treatment from uninfected cells. Each data point represents an independent experiment. Means and  $\pm$ SD are shown. \*  $p < 0.05$ , \*\*  $p < 0.01$ , \*\*\*  $p < 0.001$ .

**Table S1.** List of publicly available gene expression data sets for bioinformatics analysis

| Accession # | IAV                                                     | Cell type* | Infection time (h) | MOI  | Reference |
|-------------|---------------------------------------------------------|------------|--------------------|------|-----------|
| GSE48466    | A/Ky/136/09 (Pdm)                                       | NHBEC      | 36                 | 3    | (1)       |
| GSE48466    | A/Ky/180/10                                             | NHBEC      | 36                 | 3    | (1)       |
| GSE48466    | A/Brisbane/59/07                                        | NHBEC      | 36                 | 3    | (1)       |
| GSE32138    | A/Udorn/307/72                                          | HAEC       | 24                 | 4    | (2)       |
| GSE30723    | A/Puerto Rico/8/34                                      | ATII       | 24                 | 0.5  | (3)       |
| GSE89008    | A/Vietnam/1203/04                                       | HTBE       |                    | 5    | (4)       |
| GSE89008    | A/Wyoming/03/03                                         | HTBE       | 18                 | 5    | (4)       |
| GSE89008    | A/California/04/09                                      | HTBE       | 18                 | 5    | (4)       |
| GSE52930    | A/Puerto Rico/8/34( $\Delta$ NS1)<br>(vaccine backbone) | A549       | 12                 | 3    | (5)       |
| GSE48575    | A/Brisbane/59/07                                        | NHBEC      | 24                 | 0.9  | (6)       |
| GSE48575    | A/Mexico/4108/2009                                      | NHBEC      | 24                 | 0.9  | (6)       |
| GSE75699    | A/Puerto Rico/8/34                                      | NHBEC      | 24                 | 5    | (7)       |
| GSE19392    | A/Puerto Rico/8/34                                      | NHBEC      | 18                 | 5    | (8)       |
| GSE97949    | A/Anhui/1/2013                                          | A549       | 7                  | 1    | (9)       |
| GSE71766    | A/WS/33                                                 | BEAS-2B    | 12                 | 2    | (10)      |
| GSE36553    | A/Mexico/InDRE4487/2009                                 | A549       | 24                 | 0.01 | (11)      |
| GSE39200    | A/Texas/36/91                                           | HTBE       | 9.5                | 2    | (12)      |
| GSE31518    | A/Singapore/478/2009                                    | A549       | 10                 | 4    | (13)      |

\*NHBEC, normal human bronchial epithelial cells; HAEC, human airway epithelial cells; HTBE, human trancheobronchial epithelial cells; ATII, alveolar type II cells; A549, alveolar adenocarcinoma cell line; BEAS-2B, human bronchial epithelial cell line.

## References

1. Gerlach RL, Camp JV, Chu Y-K, Jonsson CB. 2013. Early host responses of seasonal and pandemic influenza A viruses in primary well-differentiated human lung epithelial cells. *PloS One* 8:e78912.
2. Ioannidis I, McNally B, Willette M, Peeples ME, Chaussabel D, Durbin JE, Ramilo O, Mejias A, Flaño E. 2012. Plasticity and Virus Specificity of the Airway Epithelial Cell Immune Response during Respiratory Virus Infection. *J Virol* 86:5422–5436.
3. Wang J, Nikrad MP, Phang T, Gao B, Alford T, Ito Y, Edeen K, Travanty EA, Kosmider B, Hartshorn K, Mason RJ. 2011. Innate Immune Response to Influenza A Virus in Differentiated Human Alveolar Type II Cells. *Am J Respir Cell Mol Biol* 45:582–591.
4. Heinz S, Texari L, Hayes MGB, Urbanowski M, Chang MW, Givarkes N, Rialdi A, White KM, Albrecht RA, Pache L, Marazzi I, García-Sastre A, Shaw ML, Benner C. 2018. Transcription Elongation Can Affect Genome 3D Structure. *Cell* 174:1522-1536.e22.



5. Rialdi A, Campisi L, Zhao N, Lagda AC, Pietzsch C, Ho JSY, Martinez-Gil L, Fenouil R, Chen X, Edwards M, Metreveli G, Jordan S, Peralta Z, Munoz-Fontela C, Bouvier N, Merad M, Jin J, Weirauch M, Heinz S, Benner C, van Bakel H, Basler C, García-Sastre A, Bukreyev A, Marazzi I. 2016. Topoisomerase 1 inhibition suppresses inflammatory genes and protects from death by inflammation. *Science* 352:aad7993.
6. Paquette SG, Banner D, Chi LTB, León AJ, Xu L, Ran L, Huang SSH, Farooqui A, Kelvin DJ, Kelvin AA. 2014. Pandemic H1N1 influenza A directly induces a robust and acute inflammatory gene signature in primary human bronchial epithelial cells downstream of membrane fusion. *Virology* 448:91–103.
7. Lee E-Y, Lee H-C, Kim H-K, Jang SY, Park S-J, Kim Y-H, Kim JH, Hwang J, Kim J-H, Kim T-H, Arif A, Kim S-Y, Choi Y-K, Lee C, Lee C-H, Jung JU, Fox PL, Kim S, Lee J-S, Kim MH. 2016. Infection-specific phosphorylation of glutamyl-prolyl tRNA synthetase induces antiviral immunity. *Nat Immunol* 17:1252–1262.
8. Shapira SD, Gat-Viks I, Shum BOV, Dricot A, de Grace MM, Wu L, Gupta PB, Hao T, Silver SJ, Root DE, Hill DE, Regev A, Hacohen N. 2009. A physical and regulatory map of host-influenza interactions reveals pathways in H1N1 infection. *Cell* 139:1255–1267.
9. Cao Y, Cao R, Huang Y, Zhou H, Liu Y, Li X, Zhong W, Hao P. 2018. A comprehensive study on cellular RNA editing activity in response to infections with different subtypes of influenza A viruses. *BMC Genomics* 19:925.
10. Kim T-K, Bheda-Malge A, Lin Y, Sreekrishna K, Adams R, Robinson MK, Bascom CC, Tiesman JP, Isfort RJ, Gelinas R. 2015. A systems approach to understanding human rhinovirus and influenza virus infection. *Virology* 486:146–157.
11. Loveday E-K, Svinti V, Diederich S, Pasick J, Jean F. 2012. Temporal- and strain-specific host microRNA molecular signatures associated with swine-origin H1N1 and avian-origin H7N7 influenza A virus infection. *J Virol* 86:6109–6122.
12. Tisoncik JR, Billharz R, Burmakina S, Belisle SE, Proll SC, Korth MJ, García-Sastre A, Katze MG. 2011. The NS1 protein of influenza A virus suppresses interferon-regulated activation of antigen-presentation and immune-proteasome pathways. *J Gen Virol* 92:2093–2104.
13. Sutejo R, Yeo DS, Myaing MZ, Hui C, Xia J, Ko D, Cheung PCF, Tan B-H, Sugrue RJ. 2012. Activation of Type I and III Interferon Signalling Pathways Occurs in Lung Epithelial Cells Infected with Low Pathogenic Avian Influenza Viruses. *PLOS ONE* 7:e33732.

**A**

PAM crRNA target

```
CACAGTGCCCTCCAA-GTTGCCAACTA-GCTCAAAGCCCCCTGG-TGCAG-TGCCTTCTAATGCGC-TCACCAATCCAGCACCATC genome sequence
CACAGGGCCCTCCAAGGTTGTTTACTACTCTCAAAGCCCCCTGGATGCAGCTGCCTTCTAATGCGCATCACCAATCCAGCACCATC edited allele 1
CACAGGGCCCTCCAAGGTTGTTTACTACTCTCAAAGCCCCCTGGATGCAGCTGCCTTCTAATGCGCATCACCAATCCAGCACCATC edited allele 2
```

**B**

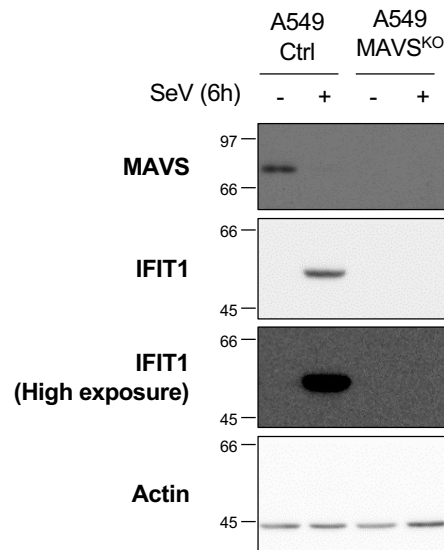

**Figure S1. Validation of MAVS genome editing and impaired antiviral interferon responses.** (A) A549 cells were subjected to CRISPR/Cas9 mediated cleavage using MAVS-specific CRISPR RNA (crRNA). Monoclonal cell populations were isolated, and disruption of the coding sequence was verified by Sanger sequencing: 2 insertions before and after the protospacer adjacent motif (PAM) and 1 insertion within the sequence targeted by the crRNA. CRISP ID web tool was used to analyze chromatograms (Dehairs, J. et al. CRISP-ID: decoding CRISPR mediated indels by Sanger sequencing *Sci. Rep.* 6, 28973; doi: 10.1038/srep28973 (2016)). (B) A549 cells transfected with a non-targeting control crRNA (A549 ctrl) or a crRNA targeting MAVS genome (A549 MAVSKO) were infected or not with Sendai Virus (SeV) at 40HAU/106 cells for 6h. Whole Cell Extracts were resolved by standard SDS-PAGE and immunoblot. Proteins were detected using anti-actin, anti-IFIT1 and anti-MAVS. Left side of the gel: molecular weight (kDa) markers Note: at this time of SeV infection, MAVS is subjected to proteasome degradation.
